1 **The genetic basis of hindwing eyespot number variation in *Bicyclus***  
2 ***anyana* butterflies**

3  
4 Angel G. Rivera-Colón<sup>\*, †</sup>, Erica L. Westerman<sup>‡</sup>, Steven M. Van Belleghem<sup>†</sup>, Antónia  
5 Monteiro<sup>§, \*\*</sup>, and Riccardo Papa<sup>†</sup>

6  
7 **Affiliations**

8 <sup>\*</sup>Department of Animal Biology, University of Illinois, Urbana-Champaign

9 <sup>†</sup>University of Puerto Rico-Rio Piedras Campus

10 <sup>‡</sup>University of Arkansas, Fayetteville

11 <sup>§</sup>National University of Singapore

12 <sup>\*\*</sup>Yale-NUS College

13  
14 **Data accessibility**

15 The *Bicyclus anyana* PstI RAD-tag sequencing data is available via the Genbank

16 Bioproject PRJNA509697. Genotype VCF files will be made available through figshare

17 upon acceptance.

18 **Running Title:** Genetics of eyespot number variation

19

20 **Key words:** Serial homology, genetics, *apterous*, eyespot number, *Bicyclus anynana*,

21 genetic architecture

22

23 **Co-Corresponding Authors:**

24 [antonia.monteiro@nus.edu.edu](mailto:antonia.monteiro@nus.edu.edu) and [rpapa.lab@gmail.com](mailto:rpapa.lab@gmail.com)

## 25 **Abstract**

26 The underlying genetic changes that regulate the appearance and disappearance of  
27 repeated traits, or serial homologs, remain poorly understood. One hypothesis is that  
28 variation in genomic regions flanking master regulatory genes, also known as input-  
29 output genes, controls variation in trait number, making the locus of evolution almost  
30 predictable. Other hypotheses implicate genetic variation in up-stream or  
31 downstream loci of master control genes. Here, we use the butterfly *Bicyclus anynana*,  
32 a species which exhibits natural variation in eyespot number on the dorsal hindwing,  
33 to test these two hypotheses. We first estimated the heritability of dorsal hindwing  
34 eyespot number by breeding multiple butterfly families differing in eyespot number,  
35 and regressing eyespot number of offspring on mid-parent values. We then estimated  
36 the number and identity of independent genetic loci contributing to eyespot number  
37 variation by performing a genome-wide association study with restriction site-  
38 associated DNA Sequencing (RAD-seq) from multiple individuals varying in number  
39 of eyespots sampled across a freely breeding lab population. We found that dorsal  
40 hindwing eyespot number has a moderately high heritability of approximately 0.50.  
41 In addition, multiple loci near previously identified genes involved in eyespot  
42 development display high association with dorsal hindwing eyespot number,  
43 suggesting that homolog number variation is likely determined by regulatory changes  
44 at multiple loci that build the trait and not by variation at single master regulators or  
45 input-output genes.

## 46 **Introduction**

47 Body plans often evolve through changes in the number of repeated parts or serial  
48 homologs by either addition or subtraction. For instance, the pelvic fins of vertebrates  
49 are inferred to have originated after the appearance of pectoral fins, perhaps via co-  
50 option of the pectoral or caudal fin developmental programs to a novel location in the  
51 body (Larouche, Zelditch, & Cloutier, 2017; Ruvinsky & Gibson-Brown, 2000). In  
52 insects, the absence of limbs and wings in the abdomen is inferred to be due to the  
53 repression (or modification) of limbs and wings in these segments by *hox* genes  
54 (Galant & Carroll, 2002; Ohde, Yaginuma, & Niimi, 2013; Ronshaugen, McGinnis, &  
55 McGinnis, 2002; Tomoyasu, Wheeler, & Denell, 2005). Regulatory targets of  
56 abdominal *hox* genes are likely to underlie loss of limb/wing number in these body  
57 segments (Ohde et al., 2013; Tomoyasu et al., 2005), although these mutations have  
58 not yet been identified. Thus, while serial homolog number variation is a common  
59 feature in the evolution of organisms' body plans, the underlying genetic changes that  
60 regulate the appearance and disappearance of these repeated traits remain poorly  
61 understood.

62

63 Studies in *Drosophila* have contributed most to the identification of the genetic basis  
64 underlying the evolution of serial homolog number. Larvae of different species have  
65 different numbers of small hairs, or trichomes, in their bodies, and variation in  
66 regulatory DNA around the gene *shavenbaby* appears to be largely responsible for this  
67 variation (McGregor et al., 2007). Moreover, *shavenbaby* has been labeled a master  
68 regulatory gene because its ectopic expression in bare regions of the body leads to

69 trichomes (Payre, Vincent, & Carreno, 1999). However, a more complex genetic  
70 architecture seems to underlie variation in the number of larger bristles found in the  
71 thorax of adults. In this case variation around *achaete-scute*, a gene complex required  
72 for bristle differentiation, plays a role in controlling bristle number variation across  
73 species (Marcellini & Simpson, 2006). Interestingly, genetic variation in upstream  
74 regulatory factors, whose spatial expression overlaps some, but not all bristles, is also  
75 known to impact bristle number in lab mutants (Garcia-Bellido & de Celis, 2009).  
76 Finally, *shavenbaby* and *scute* genes are also known as input-output genes due to their  
77 central “middle of the hour-glass” position in regulatory networks (Stern & Orgogozo,  
78 2008). These genes respond to the input of multiple upstream protein signals,  
79 present at distinct locations in the body, and in turn control the regulation of the same  
80 battery of downstream genes, to affect the same output (trichome or bristle  
81 development) at each of these body locations. Mutations in the regulatory regions of  
82 these genes are thus expected to have minimal pleiotropic effects, and to lead to  
83 changes in the number of times the network is deployed, and thus to evolution in the  
84 number of trichome or bristles in the bodies of these flies. While this type of  
85 regulatory network architecture points to predictable regions in the genome that will  
86 readily evolve leading to trait number evolution, i.e., hotspots of evolution, it might  
87 represent only one type of architecture among others that are still unexplored. More  
88 systems, thus, need to be investigated for a more thorough understanding of the  
89 genetic basis underlying variation of repeated traits in bodies.

90

91 One promising system for investigating the genetic basis of serial homolog number  
92 evolution are the eyespot patterns on the wings of nymphalid butterflies. Eyespots  
93 originally appeared on the ventral hindwing in a lineage of nymphalid butterflies,  
94 sister to the Danainae, and have subsequently been added to the forewings and dorsal  
95 surfaces of both wings (Oliver, Beaulieu, Gall, Piel, & Monteiro, 2014; Oliver, Tong,  
96 Gall, Piel, & Monteiro, 2012; Schachat, Oliver, & Monteiro, 2015). Furthermore, within  
97 a single species, eyespot number can vary significantly between individuals or sexes  
98 (Brakefield & van Noordwijk, 1985; Owen, 1993; Tokita, Oliver, & Monteiro, 2013),  
99 allowing for population genetic approaches to identify the underlying genetic basis of  
100 such variation. Genes controlling eyespot number variation within a species might  
101 also be involved in promoting this type of variation seen across species.

102

103 One of the best model species for studying the genetic basis of eyespot number  
104 variation is the nymphalid butterfly *Bicyclus anynana*. This species exhibits natural  
105 variation and sexual dimorphism in eyespot number on the dorsal hindwing surface,  
106 which play a possible role in mate choice (Westerman, Chirathivat, Schyling, &  
107 Monteiro, 2014). The observed variation consists of males averaging 0.75 dorsal  
108 hindwing eyespots, with a range of 0-3, and females averaging 1.5 dorsal hindwing  
109 eyespots, with a range of 0-5 (Westerman et al., 2014) (Fig. 1). Lab populations of this  
110 species also display a series of mutant variants that affect eyespot number on other  
111 wing surfaces. Genetic and developmental studies on eyespot number variation in  
112 this species suggest the existence of at least two different underlying molecular  
113 mechanisms. Spontaneous mutants such as Spotty (Brakefield & French, 1993;

114 Monteiro et al., 2013; Monteiro, Brakefield, & French, 1997), Missing (Monteiro et al.,  
115 2007), P- and A- (Beldade, French, & Brakefield, 2008), or X-ray induced mutations  
116 such as 3+4 (Monteiro, Prijs, Bax, Hakkaart, & Brakefield, 2003), segregate as single  
117 Mendelian alleles, and cause discrete and obvious changes in eyespot number or  
118 affect the size of very specific eyespots. On the other hand, multiple alleles of small  
119 effect likely regulate the presence or absence of small eyespots that sometimes  
120 appear between the typical two eyespots on the forewing, or on the most posterior  
121 wing sector of the ventral hindwing. This type of eyespot number variation is  
122 positively correlated with eyespot size variation, responds readily to artificial  
123 selection on eyespot size (Beldade & Brakefield, 2003; Holloway, Brakefield, &  
124 Kofman, 1993; Monteiro, Brakefield, & French, 1994), and is likely under the  
125 regulation of a threshold type mechanism (Brakefield & van Noordwijk, 1985).

126

127 Interestingly, eyespot number variation within *B. anynana* can involve changes to  
128 single eyespots or to several eyespots at a time, on one or both wing surfaces. For  
129 instance, Spotty introduces two eyespots on the dorsal and ventral surfaces of the  
130 forewing, whereas A- and P- primarily reduce the size of the single anterior (A-) or  
131 the posterior eyespot (P-) of the dorsal surface exclusively, without affecting eyespot  
132 size or number on the ventral surface. The genetic basis for these differences is still  
133 unknown.

134

135 Recently, the gene *apterousA* (*apA*) was shown to regulate wing pattern differences  
136 between dorsal and ventral surfaces in *B. anynana*, including differences in eyespot

137 number (Prakash & Monteiro, 2018). This gene is expressed exclusively on the dorsal  
138 wing surfaces and its mutation via CRISPR-Cas9 led to dorsal wing surfaces acquiring  
139 a ventral identity, which included additional eyespots. This study indicated that *apA*  
140 is a repressor of eyespots on the dorsal surface. However, *B. anynana*, has eyespots  
141 on dorsal wing surfaces and their presence and variation in number appears to be  
142 correlated with variation in the number of small circular patches, positioned at future  
143 eyespot centers, lacking *apA* expression (Prakash & Monteiro, 2018). This suggests  
144 that genetic variation at loci that modulate the expression of *apA* in eyespot centers  
145 on the dorsal surface, or genetic variation in regulatory regions of *apA* itself, might be  
146 involved in regulating eyespot number specifically on the dorsal surface of wings.

147

148 The genetic architecture of eyespot number variation in any butterfly species remains  
149 unknown. Here, we examine the genetic basis of dorsal hindwing eyespot number  
150 (DHEN) variation in *B. anynana*. We carried out two sets of experiments. We first  
151 estimated the heritability for this trait by breeding multiple butterfly families  
152 differing in eyespot number and regressing eyespot number of offspring on mid-  
153 parent values. Then we estimated the number and identity of independent genetic  
154 loci that are contributing to variation in this trait by performing a genome-wide  
155 association study with restriction site-associated DNA Sequencing (RAD-seq) from  
156 multiple individuals varying in number of eyespots sampled across a freely breeding  
157 lab population.



## 158 **Materials and Methods**

159

### 160 **Study organism**

161 *Bicyclus anynana* is a Nymphalid butterfly common to sub-tropical Africa for which a  
162 colony has been maintained in the laboratory since 1988. All *Bicyclus anynana*  
163 butterflies used in this study were collected from a colony established in New Haven,  
164 CT (Yale University), composed of an admixed population of numerous generations  
165 of freely breeding individuals with variable dorsal hindwing eyespot number  
166 phenotypes. Individuals from this colony originated from an artificial colony  
167 established in Leiden University in 1988, which was established from numerous  
168 gravid females collected in Malawi in 1988. Previous studies have estimated that this  
169 laboratory population maintains genetic diversity comparable to those of natural  
170 populations (reviewed in Westerman et al., 2016). The colony was kept in controlled  
171 conditions of 12 hours light/dark cycles, 80% relative humidity and a temperature of  
172 27°C. Larvae were fed on corn plants and adult butterflies on mashed banana, as  
173 described in previous publications (Westerman et al., 2014).

174

### 175 **Heritability of dorsal hindwing eyespot number**

176 We examined the number of dorsal hindwing eyespots (DHEN) on all offspring from  
177 18 separately reared families whose parents differed in eyespot number: six families  
178 where both parents had DHEN of zero (0F x 0M); six where both parents had DHEN  
179 of one (1F x 1M); and six where both parents had DHEN of two (2F x 2M). All  
180 generations were reared in the conditions described above. We ensured virginity of

181 the females by separating the butterflies in the parental generation into sex-specific  
182 cages on the day of eclosion. All families were started within 5 days of each other  
183 using adults ranging from 1-3 days old (ANOVA,  $n=18$ ,  $DF=2$ ,  $F=0.8266$ ,  $p=0.4565$ ).  
184 Each breeding pair was placed in a cylindrical hanging net cage of 30 cm diameter X  
185 40 cm height, with food (banana slices), water and a young corn plant on which to lay  
186 eggs. When corn plants were covered with eggs, they were placed in family-specific  
187 mesh sleeve cages for larval growth. Females were given new plants on which to lay  
188 eggs until they died. Pupae and pre-pupae were removed from the sleeve cages and  
189 placed in family-specific cylindrical hanging net cages for eclosion. The cages were  
190 checked daily for newly emerged butterflies. On the day of eclosion, DHEN was  
191 recorded for each offspring. Heritability was calculated by regressing offspring on  
192 midparent values, correcting the estimate for assortative mating, as described in  
193 Falconer & Mackay (1996). Estimates were obtained for the pooled offspring data as  
194 well as for separate regressions of female and male offspring data on mid-parent  
195 values. Sex-specific heritabilities were calculated using the correction for unequal  
196 variances in the two sexes (Falconer and Mackay, 1996). We then tested for an  
197 interaction of parental phenotype and offspring sex on offspring phenotype using a  
198 general linear model, with sex, parental phenotype, and sex\*parental phenotype as  
199 fixed variables.

200

### 201 **Sample collection and phenotype determination for genomic association study**

202 To identify regions in the genome that are associated with DHEN variation, we  
203 collected and sequenced a total of 30 individuals. Fifteen individuals contained no

204 eyespots (absence) and 15 containing two or more eyespots (presence) (Table S1).  
205 Both groups contained an assorted number of male and female individuals. Wings of  
206 the collected individuals were removed, and the bodies were preserved in ethanol for  
207 DNA extraction.

208

### 209 **RAD library preparation and sequencing**

210 Genomic DNA of the preserved bodies was extracted using DNeasy Blood & Tissue Kit  
211 (Qiagen), with an additional RNase digestion for removing RNA from the extracted  
212 nucleic acid samples. The quality and concentration of the extracted DNA was verified  
213 using gel electrophoresis and Qubit 2.0 fluorometer (Life Technologies). Extracted  
214 genomic DNA was used for preparing Illumina RAD sequencing libraries based on  
215 previously described protocols (Baird et al., 2008; Etter, Bassham, Hohenlohe,  
216 Johnson, & Cresko, 2011). DNA was digested with the frequent cutting enzyme *Pst*1  
217 and ligated to P1 adapters containing a unique barcode 5 bp in length. Samples were  
218 pooled and sheared using a Covaris M220 (Covaris Inc.) instrument and size selected  
219 for 300-500 bp inserts on average. After end-repair and P2 adapter ligation, the  
220 library was amplified by PCR. The pooled library was then sequenced utilizing a single  
221 lane of an Illumina HiSeq2000® 100 bp paired-end module.

222

### 223 **Read quality and filtering**

224 Following sequencing of a RAD-seq library composed of 30 *B. anynana* individuals,  
225 we obtained 127 million paired-end reads 100 bp in length. The raw RAD reads were  
226 demultiplexed using *Stacks v1.42* (Catchen, Hohenlohe, Bassham, Amores, & Cresko,

227 2013; Catchen et al., 2011) *process\_radtags* pipeline, and reads with low quality  
228 and/or ambiguous barcodes were discarded. Further, we removed Illumina adapter  
229 sequences from the reads and trimmed sequences to 80 bp in length, as suggested  
230 from the FastQC quality control tool  
231 (<http://www.bioinformatics.babraham.ac.uk/projects/fastqc/>) results. We retained  
232 a total of 111 million (86 %) and an individual average of 3.7 million  $\pm$  1.2 million  
233 filtered paired-end reads.

234

### 235 **Reference alignment**

236 The 111 million retained read pairs were aligned to the most recent *B. anynana*  
237 genome assembly (v1.2) with its corresponding annotation (Nowell et al., 2017). This  
238 reference assembly is composed of 10,800 individual scaffolds, for a total genome size  
239 of about 475 Mb (N50 = 638.3 kb). The annotation contains 22,642 genes, with a  
240 partial CEGMA completeness of 97.2 %. Filtered reads were aligned to the reference  
241 genome using BWA v0.7.13 (H. Li & Durbin, 2009) *mem* with default seed lengths,  
242 mismatch and gap scores, but allowing for the marking of shorter split reads as  
243 secondary alignments for compatibility with PicardTools v1.123  
244 (<https://broadinstitute.github.io/picard/>). Resulting alignments were directly  
245 converted to BAM files using SamTools v1.12 (H. Li et al., 2009) *view*. BAM files were  
246 then sorted with SamTools *index* and filtered for duplicates using PicardTools v1.123  
247 *MarkDuplicates* and processed with *AddOrReplaceReadGroups* for GATK  
248 compatibility. In total, we obtained a 92.9 % read alignment and 79.6 % properly

249 mapped read pairs. At each RAD locus, average per-individual sequencing coverage  
250 was 18.8X ( $\pm$  4.3; median: 18.3).

251

## 252 **Variant calling and association mapping**

253 Identification of associated regions of the genome was performed simultaneously  
254 using two different analytical approaches to produce method-agnostic results. The  
255 first one, referred to as the “association method”, identified variants on the filtered  
256 BAM files using GATK v3.5 (McKenna et al., 2010) *UnifiedGenotyper* with the default  
257 call confidence values and outputting only variant sites. These variant sites were then  
258 filtered using VCFTools v0.1.14 (Danecek et al., 2011) *recode* to obtain only calls with  
259 a minimum genotype quality of 30, a minimum genotype depth of 5, present in over  
260 50 % of all individuals, a max allele number of 2, and minimum allele frequency of  
261 0.05. This results in a filtered VCF containing only high-quality biallelic variants. After  
262 genotyping with *GATK*, we obtained 350,121 filtered SNPs. Genotype-to-phenotype  
263 association in the genotyped samples via the “association method” was performed  
264 using PLINK v1.90 (Clarke et al., 2011; Purcell et al., 2007). We used a genome-wide  
265 adjusted Fisher analysis to identify genotype-to-phenotype association values for  
266 each SNP. The test also implements an adaptive Monte Carlo permutation analysis to  
267 reduce the detection of false positives. This process tests the obtained *p*-values per  
268 locus after each successive permutation, with a maximum of 1,000,000 replications.  
269 The second analytical approach, referred to as the “*F<sub>ST</sub>* method”, called SNPs using  
270 *Stacks* v1.42. Using the *ref\_map.pl* wrapper script with default parameters, RAD loci  
271 were assembled from the reference genome-mapped reads using *pstacks*. A catalog of

272 all loci was generated with *cstacks* and samples were matched to this catalog using  
273 *sstacks*. The *populations* program was then run on this catalog to generate population  
274 genetic measures, enabling the calculation of F-statistics. For a variant to be included  
275 in the analysis, it had to be present in both study groups in over 75% percent of  
276 individuals ( $p=2$ ,  $r=0.75$ ) and have a minimum allele frequency above 0.05.  
277 Additionally, a Fisher's Exact Test p-value correction was applied to the resulting  $F_{ST}$   
278 and Analysis of Molecular Variance (AMOVA)  $F_{ST}$  values as a multiple testing  
279 correction. Using *Stacks* for the  $F_{ST}$  method we reconstructed 207,752 RAD loci and  
280 673,340 raw SNPs. After filtering, 73,159 RAD loci and 238,786 SNPs were retained.  
281 Filtered variants obtained from both datasets were compared to retain only SNPs  
282 with support from both genotyping methods. A total of 216,338 SNPs were shared  
283 between the two datasets and were used for subsequent comparisons.

284

### 285 **Selection of candidate loci**

286 To minimize the identification of false genotype-to-phenotype relationships, only  
287 areas of the genome displaying both association and  $F_{ST}$  peaks were used for further  
288 analysis. The use of both metrics simultaneously also ensured that the relationships  
289 observed are method agnostic. This multi-metric approach, including a combination  
290 of association and  $F_{ST}$  outliers, has been utilized repeatedly to identify genomic  
291 regions associated with domestication in both dogs and cats (Axelsson et al., 2013;  
292 Montague et al., 2014), variation in feather coloration in warblers (Brelsford, Toews,  
293 & Irwin, 2017), and the architecture and modularity of wing pattern variation in  
294 *Heliconius* butterflies (Nadeau et al., 2014; Van Belleghem et al., 2017). Significant

295 peaks were defined as areas of the genome with SNPs containing association and/or  
296  $F_{ST}$  10 standard deviations above the genome-wide mean. Candidate variants were  
297 then annotated using *SnpEff*v4.3T (Cingolani et al., 2012), building a *de novo* database  
298 with the available *B. anynana* reference annotation, to identify possible effects over  
299 nearby genes.

300

### 301 **Principal Component Analysis**

302 To determine the baseline-level genome-wide diversity and divergence among  
303 individuals in the present population, we performed a Principal Component Analysis  
304 (PCA) on the obtained genotypes. Although our sampled individuals originated from  
305 a single, freely breeding population, performing this analysis allowed us to  
306 corroborate that the observed genomic diversity lacks any substructuring that could  
307 impact our outlier identification. To do this, we randomly selected a subset of 5000  
308 filtered variants from the *Stacks* catalog and made them into a whitelist, as described  
309 by the *Stacks* manual and by Rochette & Catchen (2017). We then ran the *populations*  
310 module on this subset of variants with the addition of the *--genepop* export format  
311 flag. The resulting genepop file was processed using the *adegenet* v2.1.1 R package  
312 (Jombart, 2008; Jombart & Ahmed, 2011) by converting the genotype calls into a  
313 *genind* object, scaling missing data by mean allele frequency and analyzed with PCA.

314

### 315 **Ordering of the *B. anynana* scaffolds along the *Heliconius melpomene* genome**

316 The current *B. anynana* reference assembly (Nowell et al., 2017) has an N50 of 638.3  
317 kb and is composed of 10,800 unlinked scaffolds. To assess whether associated SNPs

318 on separate *B. anynana* genome scaffolds could be part of the same block of  
319 association, we ordered the scaffolds of the *B. anynana* genome along the *Heliconius*  
320 *melpomene* v2 genome assembly (Davey et al., 2016). Although *B. anynana* and *H.*  
321 *melpomene* diverged about 80 My ago (Espeland et al., 2018) and have a different  
322 karyotype (n=28 in *B. anynana* versus n=21 in *H. melpomene*), the *H. melpomene*  
323 genome is the most closely related butterfly genome that has been assembled into  
324 highly contiguous chromosomal scaffolds using pedigree informed linkage maps.  
325 Aligning both genomes provides valuable information to interpret our association  
326 analysis. To construct this alignment, we used the alignment tool *promer* from the  
327 MUMmer v3.0 software suite (Kurtz et al., 2004). *Promer* was used with default  
328 settings to search for matches between sequences translated in all six possible  
329 reading frames between the *B. anynana* and *H. melpomene* genome. The obtained  
330 alignments were subsequently filtered for a minimum alignment length of 200 bp and  
331 a minimum percent identity ( $\%IDY = (\text{matches} \times 100) / (\text{length of aligned region})$ ) of  
332 90 %. These filtered alignments were used to order the *B. anynana* scaffolds according  
333 to the order in which they aligned along the *H. melpomene* genome. If a scaffold  
334 aligned to multiple locations or chromosomes, priority was given to the position it  
335 matched with highest identity. For scaffolds that contained significant associations  
336 with hindwing eyespot number, we also retained alignments with a minimum %IDY  
337 of 70 % and a minimum alignment length of 150 bp to investigate possible fine scale  
338 rearrangements between the *B. anynana* and *H. melpomene* genome.  
339  
340



## 341 **Linkage disequilibrium analysis**

342 In addition to ordering the *B. anynana* scaffolds to the *H. melpomene* genome for  
343 assessing the genomic linkage of SNPs, we calculated linkage disequilibrium in our *B.*  
344 *anynana* study population. To calculate linkage disequilibrium for genomic SNPs, we  
345 phased 213,000 SNPs that were genotyped in all samples using *beagle* v4.1 (Browning  
346 & Browning, 2007). Estimates of linkage disequilibrium were calculated from  
347 100,000 randomly selected SNPs, using the *VCFtools* v0.1.14 (Danecek et al., 2011) –  
348 *hap-r2* function, with a max LD window of 5 Mbp, and minimum allele frequency  
349 cutoff of 0.10. Resulting LD comparisons for genomic SNPs were then plotted in R,  
350 where a Loess local regression was calculated and used to determine the genome-  
351 wide window size of linkage disequilibrium decay. Subsequently, this LD window size  
352 was used for the investigation of genes near associated loci.

353

## 354 **Results**

355

### 356 **Dorsal hindwing spot number variation has moderate to high heritability**

357 Zero spot females were only produced by 0x0 families and one 1x1 family, and were  
358 absent from any 2x2 DHS families. Zero spot males, however, were produced by all  
359 0x0 families, all but one of the 1x1 families and all but one of the 2x2 families. Two  
360 spot females were produced by all but one (a 0x0) family, while 2 spot males were  
361 produced by all 2x2 families, but only two 1x1 families and one 0x0 family (Table 1).  
362 These results demonstrate that alleles are sufficiently segregating in our  
363 experimental design to perform heritability estimates.

364

365 DHEN has a heritability of  $0.4442 \pm 0.264$  for females,  $0.5684 \pm 0.306$  for males, and  
366  $0.5029 \pm 0.159$  when the sexes were pooled. There was no significant interaction of  
367 parental phenotype and offspring sex on offspring phenotype (General linear Model  
368 with sex, parental phenotype, and sex\*parental phenotype as parameters, AICc  
369 (Akaike Information Criterion) = 1498.204, effect tests: sex  $\chi^2=293.361$ ,  $p<0.0001$ ;  
370 parental phenotype  $\chi^2=271.56$ ,  $p<0.0001$ ; sex\* parental phenotype  $\chi^2=0.032$ ,  
371  $p=0.8576$ ).

372

373

#### 374 **Genome-wide variation and linkage disequilibrium of the study population**

375 To confirm the absence of population substructure in our study population, we  
376 calculated measures of genetic variation and diversity between the samples  
377 displaying presence of DHEN (pre) and samples with absent DHEN (abs). As expected,  
378 the two groups showed very little genome-wide genetic divergence, with a genome-  
379 wide  $F_{ST}$  equal to 0.0075. The absence of any population substructure between the  
380 two sampled phenotype groups was further demonstrated by complete overlap of the  
381 two groups in the PCA as well as little contribution of phenotype group to the  
382 observed variation in first and second Principal Components (Fig. 2A). Additionally,  
383 we observed very similar genome-wide nucleotide diversity in the group displaying  
384 presence of DHEN (pre,  $\pi = 0.0090$ ) when compared to the group with absent DHEN  
385 (abs,  $\pi = 0.0083$ ). Hence, we do not observe any demographic substructuring of the  
386 study population that could potentially bias our genetic association analysis.

387

388 After calculating genome-wide estimates of linkage disequilibrium decay (Fig. 2B),  
389 we observed a max smoothed  $r^2$  value of 0.272, and a halving of  $r^2$  within 464 Kb (Fig.  
390 2B). This window size suggests that average linkage blocks are around 500 Kb in  
391 length, and that variants within this distance are in strong linkage disequilibrium.

392

### 393 **Association mapping of dorsal hindwing spot number variation.**

394 After mapping and genotyping RAD loci across the *B. anynana* reference (Nowell et  
395 al., 2017), we identified a total of 216,338 SNPs shared between the two different  
396 genotyping strategies used (see methods), of which 340 SNPs display both elevated  
397  $F_{ST}$  and significantly high association with DHEN variation. These candidate SNPs are  
398 located in 15 different scaffolds of the *B. anynana* genome assembly spanning 3.54  
399 Mbp equal to 0.744% of the whole genome (Fig. 3). The relatively close proximity of  
400 associated variants within the 15 associated scaffolds, particularly within our 500 kb  
401 LD windows, suggests that only 15 discrete regions influence DHEN variation. Further  
402 ordering these scaffolds along the contiguously assembled *Heliconius melpomene*  
403 genome suggest that they likely belong to 10 to 11 different genomic regions in the  
404 genome (Fig. 4) and thus strongly suggest DHEN variation is a polygenic trait with  
405 multiple loci.

406

### 407 **Candidate gene identification**

408 Using the available Lepbase reference annotation for the *B. anynana* v1.2 assembly  
409 we identified the neighboring annotated genes and relative positioning of the 340

410 outlier SNPs common to both the  $F_{ST}$  and genome-wide association. The majority of  
411 these SNPs were in non-coding sequence, with 116 (34.1%) being intergenic, 78  
412 (22.9%) immediately upstream, and 49 (14.4%) immediately downstream of  
413 annotated genes (Supplemental Table S3). Of the 340 outlier SNPs, 11 (3.2%) produce  
414 non-synonymous changes to coding regions, while 1 (0.3%) causes change in a splice  
415 region sequence.

416

417 When the annotation is observed at a genic level, the biggest proportion of SNPs occur  
418 closely downstream or upstream of annotated genes, 10 (23.8%) and 12 (28.6%)  
419 genes, respectively, and could have regulatory effects over nearby genes  
420 (Supplemental Table S3). The 11 SNPs that cause non-synonymous changes are  
421 located within only two genes: 1) BANY.1.2.g01110 (Zinc finger CCCH domain-  
422 containing protein 10, *ZC3H10*) has a Serine to Cysteine substitution in position 114,  
423 and a Isoleucine to Valine substitution in position 142. 2) BANY.1.2.g04901  
424 (Geranylgeranyl pyrophosphate synthase, *GGPS1*) contains a Arginine to Glutamine  
425 substitution, and a Isoleucine to Threonine substitution in positions 96 and 98,  
426 respectively. Finally, BANY.1.2.g13875 (Acidic fibroblast growth factor intracellular-  
427 binding protein, *Fibp*), contains the identified splice region variant.

428

429 A number of annotated genes observed within or nearby associated regions of the  
430 genome were implicated in eyespot development in previous studies, whereas other  
431 genes are here implicated for the first time (Table 2). BANY.1.2.g00030 (Neutral  
432 Ceramidase, *CDase*) was previously identified as differentially expressed in eyespots

433 relative to flanking wing tissue (Özsu & Monteiro, 2017). BANY.1.2.g04910 (Protein  
434 *spaetzle*, *spz*) is involved in the regulation of the Toll signaling pathway, recently  
435 implicated in eyespot development (Özsu & Monteiro, 2017). Calcium signaling-  
436 related genes were also identified, including BANY.1.2.g00659 (Calcium/calmodulin-  
437 dependent protein kinase type 1, *cmk-1*), BANY.1.2.g04904 (Calcium-activated  
438 potassium channel *slowpoke*, *slo*) and BANY.1.2.g05412 (Transient receptor  
439 potential channel *pyrexia*, *pyx*). Calcium signaling has been recently associated with  
440 eyespot formation in *B. anynana* (Özsu & Monteiro, 2017). BANY.1.2.g10819 (Ero1-  
441 like protein, *Ero1L*), BANY.1.2.g00658 (Disks large 1 tumor suppressor protein, *dlg1*)  
442 and BANY.1.2.g00681 (Protein *numb*, *numb*) have functions related to Notch  
443 signaling, a pathway previously associated with eyespot formation (Reed & Serfas,  
444 2004). Additionally, BANY.1.2.g02571 (Homeotic protein *antennapedia*, *Antp*) known  
445 to be expressed in early stages of eyespot development (Saenko, Marialva, & Beldade,  
446 2011) and BANY.1.2.g00653 (Protein *decapentaplegic*, *dpp*) expressed in dynamic  
447 patterns during eyespot center formation during the larval stage (Connahs et al., 2017  
448 - *bioRxiv*; Monteiro, Glaser, Stockslager, Glansdorp, & Ramos, 2006) were also  
449 identified within areas of high association. BANY.1.2.g04715 (C2 domain-containing  
450 protein 5, *C2CD5*) appears to be involved in insulin receptor signaling, a pathway that  
451 has, so far, not been implicated in eyespot development nor eyespot plasticity.

## 452 Discussion

453

454 The use of population genomic analyses, including association mapping, GWAS, and  
455  $F_{ST}$  scans, has been extensively used in natural populations to identify the genomic  
456 components underlying a number of biological processes such as hybridization and  
457 speciation, local adaptation, and ecological and landscape genomics (Reviewed in  
458 Campbell, Poelstra, & Yoder, 2018; Narum, Buerkle, Davey, Miller, & Hohenlohe,  
459 2013; Rellstab, Gugerli, Eckert, Hancock, & Holderegger, 2015). In our work, we  
460 applied a population genomics approach to identifying the genetic component of  
461 dorsal hindwing number variation in the butterfly *B. anynana* via the comparison of  
462 genomic diversity between individuals from a single laboratory-maintained, free-  
463 breeding population. We demonstrated that free-breeding in the laboratory  
464 population has likely maintained homogenization of the genetic variation across the  
465 genome due to a lack of demographic substructuring, reducing the detection of false  
466 positive associations between SNPs and the trait of interest, DHEN variation.

467

468 The combined results of our heritability and genome-wide association study suggest  
469 that variation in dorsal hindwing eyespot number in *B. anynana* is a complex trait  
470 regulated by multiple loci. Using a combination of RAD sequencing and genome-wide  
471 association mapping, we identified 10 to 11 potentially distinct genomic regions in  
472 the *B. anynana* reference genome associated with variation in DHEN. Further analysis  
473 of these genomic regions highlights a total of 15 candidate genes (Table 2). Some (7)  
474 of these genes have previously been found associated with eyespot development via

475 their expression patterns or via functional studies, while others (8) are suggested for  
476 the first time. Complete list of all annotated genes identified in the associated regions  
477 is provided in the supplemental data (Supplemental Table S2).

478

#### 479 **DHEN variation and known elements of the eyespot regulatory network**

480 Among our identified candidates, we observe a number of genes previously  
481 implicated in eyespot development in *B. anynana*. Our analysis suggests six of the  
482 genes known to be expressed in eyespots are associated with DHEN: *Ubx*, *Antp*, *Dpp*,  
483 *dlg1*, *numb*, *Ero1L*, and *CDase*. BANY.1.2.g02579 is annotated as the hox protein  
484 Ultrabithorax (*Ubx*), an important selector gene that gives insect hindwings, including  
485 those of butterflies, a different identity from forewings (Tong, Hrycaj, Podlaha,  
486 Popadić, & Monteiro, 2014; Weatherbee et al., 1999). In *B. anynana*, this gene is  
487 expressed across the whole hindwing, a conserved expression pattern observed  
488 across insects, but has additional, stronger, expression in the eyespot centers of the  
489 hindwing only, something that is not seen in other butterflies with eyespot such as  
490 *Junonia coenia* (Tong et al., 2014). Over-expression of this gene led to eyespot size  
491 reductions in both fore and hindwings of *B. anynana* (Tong et al., 2014). However,  
492 absence of *Ubx* in clones of cells in the hindwing of *J. coenia* (via a spontaneous  
493 unknown mutation) (Weatherbee et al., 1999) and CRISPR knockouts in *B. anynana*  
494 (Y. Matsuoka, unpublished) led to both eyespot enlargements (of Cu1 eyespots to  
495 sizes that match Cu1 forewing eyespot sizes), and to complete deletions of eyespots  
496 that are normally present in the ventral hindwing (M2 and M3) but absent on the  
497 forewing. These results suggest both a repressing role and an activating role for *Ubx*

498 that depends on eyespot position on the hindwing. Our results indicate that genetic  
499 variation at *Ubx* might contribute to eyespot number variation either via a threshold-  
500 like mechanism acting on eyespot size or a more discrete mechanism regulating  
501 presence or absence of eyespots in specific wing sectors.

502

503 BANY.1.2.g02571 is annotated as the protein Antennapedia (*Antp*), another hox gene  
504 involved in the differentiation of the anterior-posterior body axis in insects and  
505 involved in the differentiation of the thoracic limbs in *Bombyx* moths (Chen et al.,  
506 2013). *Antp* expression has been observed as one of the earliest expressed genes in  
507 developing eyespot centers (Saenko et al., 2011), and in dorsal eyespots (Özsu &  
508 Monteiro, 2017). Knock-out of *Antp* indicates this gene is required for forewing  
509 eyespot development and for the development of the white centers and the full size  
510 of the hindwing eyespots (Y. Matsuoka, unpublished). Variation at this locus appears  
511 to contribute to hindwing eyespot number variation, perhaps using a similar  
512 threshold-like mechanisms to that proposed for *Ubx*, based on eyespot size  
513 regulation.

514

515 BANY.1.2.g00653 is annotated as decapentaplegic (*Dpp*), a candidate morphogen  
516 likely involved in the differentiation of the eyespot centers in *B. anynana* via a  
517 reaction-diffusion mechanism (Connahs et al., 2017 - *bioRxiv*). *Dpp* mRNA is  
518 expressed in regions around the developing eyespots in mid to late larval wings  
519 (Connahs et al., 2017 - *bioRxiv*) in anti-colocalized patterns to Armadillo, a  
520 transcription factor effector of the Wingless signaling pathway, expressed in the



521 actual eyespot centers in late larval stages (Connahs et al., 2017 - *bioRxiv*). Genetic  
522 variation either linked with the protein coding sequence of *Dpp*, or more likely with  
523 its regulatory region affects eyespot number variation in hindwings.

524

525 Three genes known to interact with another eyespot-associated gene, *Notch* (Reed &  
526 Serfas, 2004), are also implicated in our study. BANY.1.2.g00658 (Disks large 1 tumor  
527 suppressor protein, *dlg1*), BANY.1.2.g00681 (protein numb, *numb*), and  
528 BANY.1.2.g10819 (Ero1-like protein, *Ero1L*) are known to interact and regulate the  
529 *Notch* (*N*) signaling pathway in *Drosophila melanogaster* (Cheah, Chia, & Yang, 2000;  
530 Q. Li et al., 2009; Tien et al., 2008). The existence and role of these interactions are  
531 unknown in *B. anynana*, as is the role of the *Notch* receptor itself. However, the *Notch*  
532 receptor has a dynamic pattern of expression (Reed & Serfas, 2004) that is very  
533 similar to that of *Distal-less*, a gene that has recently been implicated in setting up the  
534 eyespot centers likely via a reaction-diffusion mechanism (Connahs et al., 2017 -  
535 *bioRxiv*). Genetic variation at these three genes could be interacting with the eyespot  
536 differentiation process through unknown mechanisms.

537

538 Newly identified components of pathways previously associated with eyespot  
539 development, such as Toll and Calcium signaling (Özsu & Monteiro, 2017), have also  
540 been observed among our candidates. BANY.1.2.g00959 (Calcium/calmodulin-  
541 dependent protein kinase type 1, *cmk-1*), BANY.1.2.g04715 (C2 domain-containing  
542 protein 5, *C2CD5*), BANY.1.2.g04904 (Calcium-activated potassium channel  
543 slowpoke, *slo*) and BANY.1.2.g05412 (Transient receptor potential channel pyrexia,

544 *pyx*) all possess Calcium binding and/or interactions with Calcium signaling among  
545 their annotated functions, while BANY.1.2.g00647 (Phosphoinositide 3-kinase  
546 adapter protein 1, *PIK3AP1*) and BANY.1.2.g04910 (Protein *spatzle*, *spz*) both  
547 interact and/or regulate the Toll signaling pathway among their annotated functions.  
548 *Spatzle*, in particular, is a ligand that enables the activation of the Toll pathway in  
549 *Drosophila* (Yamamoto-Hino & Goto, 2016). The role of *Spatzle* is currently unknown  
550 in the context of eyespot development but this ligand could be an interesting target  
551 of further study. Our data suggests that genetic variation at these loci are also  
552 regulating hindwing eyespot number variation.

553

#### 554 **Effects of non-coding mutations in the evolution of eyespot number variation**

555 After identifying 10 to 11 regions of the *B. anynana* genome associated with DHEN  
556 variation and characterizing the relationship of identified SNPs with nearby genes we  
557 observe that the majority of the SNPs fall outside coding sequences (90.8%), and most  
558 of the ones that do fall inside protein coding sequences result in synonymous  
559 mutations (Supplemental figure/table). Only two genes, BANY.1.2.g01110 (Zinc  
560 finger CCCH domain-containing protein 10, *ZC3H10*) and BANY.1.2.g04901  
561 (Geranylgeranyl pyrophosphate synthase, *GGPS1*) contain SNPs that represent non-  
562 synonymous mutations of unknown effect. Such non-coding DNA variation linked to  
563 DHEN is likely to be *cis*-regulatory and controlling the expression of the nearby genes  
564 described above. *cis*-regulatory elements are thought to have profound implications  
565 in the evolution of morphological diversity (Carroll, 2008). Particularly, they have  
566 been associated with variation in pigmentation patterns in a wide variety of animal

567 systems, including the evolution of eggspot pigmentation patterns in cichlids (Santos  
568 et al., 2014), wing pigmentation patterns in *Drosophila* (Koshikawa et al., 2015;  
569 Werner, Koshikawa, Williams, & Carroll, 2010), divergent pigmentation patterns in  
570 capuchino seedeater finches (Campagna et al., 2017), variation in red, black and  
571 yellow color patterns in *Heliconius* butterflies due to regulatory changes in the *optix*,  
572 *WntA* and *Cortex* genes (Martin & Reed, 2014; Reed et al., 2011; Supple et al., 2013;  
573 Van Belleghem et al., 2017) among others. In the case of eyespot number variation,  
574 regulatory mutations around the genes identified here might disrupt the reaction-  
575 diffusion mechanism of eyespot center differentiation (Connahs et al., 2017 - *bioRxiv*),  
576 or later processes of eyespot center signaling, that eventually translate to presence of  
577 absence of an eyespot in particular wing sectors.

578

579 Concluding, the genetic variation uncovered in this work affects eyespot number  
580 variation on the dorsal surface but not on the ventral surface of the wing. Thus, our  
581 work suggests that the genetic variants identified with our analysis affect eyespot  
582 number in a surface-specific manner. This surface-specific regulation is potentially  
583 mediated via *apA*, a previously identified dorsal eyespot repressor (Prakash &  
584 Monteiro, 2018). The polygenic nature of our results argue that genetic variation at  
585 the loci identified above, e.g., *Antp*, *Ubx*, *dpp*, etc, rather than at the *apA* locus itself  
586 regulates dorsal eyespot number. The way in which these genes interact is unclear,  
587 but changes in gene expression at the identified loci might impact the repression of  
588 *apA* in specific wing sectors on the dorsal surface, allowing eyespots to differentiate  
589 in those sectors.

590

591 Finally, the use of a genome-wide sequencing strategy allowed us to discover a series  
592 of independent loci that appear to contribute to DHEN in *B. anynana*. These loci,  
593 predominantly composed of polymorphisms in non-coding DNA, suggest that  
594 changes in DHEN are mostly occurring in regions that regulate the expression of  
595 previously known eyespot-associated genes. Thus, while our work has enriched the  
596 list of genes involved in eyespot number variation, it also confirms that variation at  
597 multiple genes, rather than at a single top master regulator or input-output gene  
598 (such as *shavenbaby* or *achaete-scute*) is involved in regulating number of serial  
599 homologs. This highlights a more complex, but still poorly understood, genetic  
600 architecture for serial homolog number regulation.

601

## 602 **Acknowledgements**

603 We thank Elizabeth Schyling for help rearing families for heritability analysis, and  
604 Robert Rak and Chris Bolick for rearing corn plants for the larvae. We also thank the  
605 UPR-RP Sequencing and Genomics Facility and the UPR-RP High Performance Computing  
606 Facility for additional support in library preparation and computational analysis. This  
607 work was funded by a NSF IOS-110382 Doctoral Dissertation Improvement Grant to  
608 ELW and AM, a NSF PR-LSAMP Bridge to the Doctorate Program (NSF Grant Award  
609 HRD1139888) to AGRC, and a Ministry of Education, Singapore grant (MOE2015-T2-  
610 2-159) to AM.

## 611 Literature Cited

- 612 Axelsson, E., Ratnakumar, A., Arendt, M.-L., Maqbool, K., Webster, M. T., Perloski, M., ... Lindblad-Toh,  
613 K. (2013). The genomic signature of dog domestication reveals adaptation to a starch-rich diet.  
614 *Nature*, 495(7441), 360–364. <https://doi.org/10.1038/nature11837>
- 615 Baird, N. a., Etter, P. D., Atwood, T. S., Currey, M. C., Shiver, A. L., Lewis, Z. a., ... Johnson, E. a. (2008).  
616 Rapid SNP Discovery and Genetic Mapping Using Sequenced RAD Markers. *PLoS ONE*, 3(10),  
617 e3376. <https://doi.org/10.1371/journal.pone.0003376>
- 618 Beldade, P., & Brakefield, P. M. (2003). Concerted evolution and developmental integration in  
619 modular butterfly wing patterns. *Evolution and Development*, 5(2), 169–179.  
620 <https://doi.org/10.1046/j.1525-142X.2003.03025.x>
- 621 Beldade, P., French, V., & Brakefield, P. M. (2008). Developmental and genetic mechanisms for  
622 evolutionary diversification of serial repeats: eyespot size in *Bicyclus anynana* butterflies.  
623 *Journal of Experimental Zoology Part B: Molecular and Developmental Evolution*, 310B(2), 191–  
624 201. <https://doi.org/10.1002/jez.b.21173>
- 625 Brakefield, P. M., & French, V. (1993). Butterfly wing patterns. *Acta Biotheoretica*, 41(4), 447–468.  
626 <https://doi.org/10.1007/BF00709376>
- 627 Brakefield, P. M., & van Noordwijk, A. J. (1985). The genetics of spot pattern characters in the  
628 meadow brown butterfly *Maniola jurtina* (Lepidoptera: Satyrinae). *Heredity*, 54(2), 275–284.  
629 <https://doi.org/10.1038/hdy.1985.37>
- 630 Brelford, A., Toews, D. P. L., & Irwin, D. E. (2017). Admixture mapping in a hybrid zone reveals loci  
631 associated with avian feather coloration. *Proc. R. Soc. B*, 284(1866), 20171106.  
632 <https://doi.org/10.1098/RSPB.2017.1106>
- 633 Browning, S. R., & Browning, B. L. (2007). Rapid and Accurate Haplotype Phasing and Missing-Data  
634 Inference for Whole-Genome Association Studies By Use of Localized Haplotype Clustering. *The*  
635 *American Journal of Human Genetics*, 81(5), 1084–1097. <https://doi.org/10.1086/521987>
- 636 Campagna, L., Repenning, M., Silveira, L. F., Fontana, C. S., Tubaro, P. L., & Lovette, I. J. (2017).  
637 Repeated divergent selection on pigmentation genes in a rapid finch radiation. *Science*  
638 *Advances*, 3(5), e1602404. <https://doi.org/10.1126/sciadv.1602404>
- 639 Campbell, C. R., Poelstra, J. W., & Yoder, A. D. (2018). What is Speciation Genomics? The roles of  
640 ecology, gene flow, and genomic architecture in the formation of species. *Biological Journal of*  
641 *the Linnean Society*, 124(4), 561–583. <https://doi.org/10.1093/biolinnean/bly063>
- 642 Carroll, S. B. (2008). Evo-Devo and an Expanding Evolutionary Synthesis: A Genetic Theory of  
643 Morphological Evolution. *Cell*, 134(1), 25–36. <https://doi.org/10.1016/j.cell.2008.06.030>
- 644 Catchen, J. M., Amores, A., Hohenlohe, P. A., Cresko, W. A., Postlethwait, J. H., & De Koning, D.-J. (2011).  
645 Stacks: Building and Genotyping Loci De Novo From Short-Read Sequences. *G3: Genes, Genomes,*  
646 *Genetics*, 1(3), 171–182. <https://doi.org/10.1534/g3.111.000240>
- 647 Catchen, J. M., Hohenlohe, P. A., Bassham, S., Amores, A., & Cresko, W. A. (2013). Stacks: an analysis  
648 tool set for population genomics. *Molecular Ecology*, 22(11), 3124–3140.  
649 <https://doi.org/10.1111/mec.12354>
- 650 Cheah, P. Y., Chia, W., & Yang, X. (2000). Jumeaux, a novel *Drosophila* winged-helix family protein, is  
651 required for generating asymmetric sibling neuronal cell fates. *Development*, 127(15), 3325–  
652 3335. Retrieved from <http://dev.biologists.org/content/127/15/3325>
- 653 Cingolani, P., Platts, A., Wang, L. L., Coon, M., Nguyen, T., Wang, L., ... Ruden, D. M. (2012). A program  
654 for annotating and predicting the effects of single nucleotide polymorphisms, SnpEff. *Fly*, 6(2),  
655 80–92. <https://doi.org/10.4161/fly.19695>
- 656 Clarke, G. M., Anderson, C. A., Pettersson, F. H., Cardon, L. R., Morris, A. P., & Zondervan, K. T. (2011).  
657 Basic statistical analysis in genetic case-control studies. *Nature Protocols*, 6(2), 121–133.  
658 <https://doi.org/10.1038/nprot.2010.182>
- 659 Connahs, H., Tlili, S., van Creijl, J., Loo, T. Y. J., Banerjee, T., Saunders, T. E., & Monteiro, A. (2017).  
660 Disrupting different Distal-less exons leads to ectopic and missing eyespots accurately modeled  
661 by reaction-diffusion mechanisms. *BioRxiv*. <https://doi.org/10.1101/183491>
- 662 Danecek, P., Auton, A., Abecasis, G., Albers, C. A., Banks, E., DePristo, M. A., ... Durbin, R. (2011). The  
663 variant call format and VCFtools. *Bioinformatics*, 27(15), 2156–2158.

- 664 <https://doi.org/10.1093/bioinformatics/btr330>
- 665 Davey, J. W., Chouteau, M., Barker, S. L., Maroja, L., Baxter, S. W., Simpson, F., ... Jiggins, C. D. (2016).  
666 Major Improvements to the *Heliconius melpomene* Genome Assembly Used to Confirm 10  
667 Chromosome Fusion Events in 6 Million Years of Butterfly Evolution. *G3: Genes/Genomes/Genetics*, 6(3), 695–708. <https://doi.org/10.1534/g3.115.023655>
- 668 Espeland, M., Breinholt, J., Willmott, K. R., Warren, A. D., Vila, R., Toussaint, E. F. A., ... Kawahara, A. Y.  
669 (2018). A Comprehensive and Dated Phylogenomic Analysis of Butterflies. *Current Biology*,  
670 28(5), 770–778.e5. <https://doi.org/10.1016/j.cub.2018.01.061>
- 671 Etter, P. D., Bassham, S. L., Hohenlohe, P. A., Johnson, E. a., & Cresko, W. A. (2011). SNP Discovery and  
672 Genotyping for Evolutionary Genetics Using RAD Sequencing. *Methods Mol Biol*, 772(6), 157–  
673 178. <https://doi.org/10.1007/978-1-61779-228-1>
- 674 Galant, R., & Carroll, S. B. (2002). Evolution of a transcriptional repression domain in an insect Hox  
675 protein. *Nature*, 415(6874), 910–913. <https://doi.org/10.1038/nature717>
- 676 Garcia-Bellido, A., & de Celis, J. F. (2009). The Complex Tale of the achaete-scute Complex: A  
677 Paradigmatic Case in the Analysis of Gene Organization and Function During Development.  
678 *Genetics*, 182(3), 631–639. <https://doi.org/10.1534/genetics.109.104083>
- 679 Holloway, G. J., Brakefield, P. M., & Kofman, S. (1993). The genetics of wing pattern elements in the  
680 polyphenic butterfly, *Bicyclus anynana*. *Heredity*, 70(2), 179–186.  
681 <https://doi.org/10.1038/hdy.1993.27>
- 682 Jombart, T. (2008). adegenet: a R package for the multivariate analysis of genetic markers.  
683 *Bioinformatics*, 24(11), 1403–5. <https://doi.org/10.1093/bioinformatics/btn129>
- 684 Jombart, T., & Ahmed, I. (2011). adegenet 1.3-1: new tools for the analysis of genome-wide SNP data.  
685 *Bioinformatics*, 27(21), 3070–3071. <https://doi.org/10.1093/bioinformatics/btr521>
- 686 Koshikawa, S., Giorgianni, M. W., Vaccaro, K., Kassner, V. A., Yoder, J. H., Werner, T., & Carroll, S. B.  
687 (2015). Gain of cis -regulatory activities underlies novel domains of wingless gene expression in  
688 *Drosophila*. *Proceedings of the National Academy of Sciences*, 112(24), 7524–7529.  
689 <https://doi.org/10.1073/pnas.1509022112>
- 690 Kurtz, S., Phillippy, A., Delcher, A. L., Smoot, M., Shumway, M., Antonescu, C., & Salzberg, S. L. (2004).  
691 Versatile and open software for comparing large genomes. *Genome Biology*, 5(2), R12.  
692 <https://doi.org/10.1186/gb-2004-5-2-r12>
- 693 Larouche, O., Zelditch, M. L., & Cloutier, R. (2017). Fin modules: an evolutionary perspective on  
694 appendage disparity in basal vertebrates. *BMC Biology*, 15(1), 32.  
695 <https://doi.org/10.1186/s12915-017-0370-x>
- 696 Li, H., & Durbin, R. M. (2009). Fast and accurate short read alignment with Burrows-Wheeler  
697 transform. *Bioinformatics*, 25(14), 1754–1760.  
698 <https://doi.org/10.1093/bioinformatics/btp324>
- 699 Li, H., Handsaker, B., Wysoker, A., Fennell, T. J., Ruan, J., Homer, N., ... Durbin, R. M. (2009). The  
700 Sequence Alignment/Map format and SAMtools. *Bioinformatics*, 25(16), 2078–2079.  
701 <https://doi.org/10.1093/bioinformatics/btp352>
- 702 Li, Q., Shen, L., Xin, T., Xiang, W., Chen, W., Gao, Y., ... Li, M. (2009). Role of Scrib and Dlg in anterior-  
703 posterior patterning of the follicular epithelium during *Drosophila* oogenesis. *BMC*  
704 *Developmental Biology*, 9(1), 60. <https://doi.org/10.1186/1471-213X-9-60>
- 705 Marcellini, S., & Simpson, P. (2006). Two or Four Bristles: Functional Evolution of an Enhancer of  
706 scute in *Drosophilidae*. *PLoS Biology*, 4(12), e386.  
707 <https://doi.org/10.1371/journal.pbio.0040386>
- 708 Martin, A., & Reed, R. D. (2014). Wnt signaling underlies evolution and development of the butterfly  
709 wing pattern symmetry systems. *Developmental Biology*, 395(2), 367–378.  
710 <https://doi.org/10.1016/j.ydbio.2014.08.031>
- 711 McGregor, A. P., Orgogozo, V., Delon, I., Zanet, J., Srinivasan, D. G., Payre, F., & Stern, D. L. (2007).  
712 Morphological evolution through multiple cis-regulatory mutations at a single gene. *Nature*,  
713 448(7153), 587–590. <https://doi.org/10.1038/nature05988>
- 714 McKenna, A., Hanna, M., Banks, E., Sivachenko, A., Cibulskis, K., Kernytsky, A., ... DePristo, M. A.  
715 (2010). The Genome Analysis Toolkit: A MapReduce framework for analyzing next-generation  
716 DNA sequencing data. *Genome Research*, 20(9), 1297–1303.  
717 <https://doi.org/10.1101/gr.107524.110>
- 718

- 719 Montague, M. J., Li, G., Gandolfi, B., Khan, R., Aken, B. L., Searle, S. M. J., ... Warren, W. C. (2014).  
720 Comparative analysis of the domestic cat genome reveals genetic signatures underlying feline  
721 biology and domestication. *Proceedings of the National Academy of Sciences*, *111*(48), 17230–  
722 17235. <https://doi.org/10.1073/pnas.1410083111>
- 723 Monteiro, A., Brakefield, P. M., & French, V. (1994). The evolutionary genetics and developmental  
724 basis of wing pattern variation in the butterfly *Bicyclus anynana*. *Evolution*, *48*(4), 1147–1157.  
725 <https://doi.org/10.2307/2410374>
- 726 Monteiro, A., Brakefield, P. M., & French, V. (1997). Butterfly eyespots: the genetics and development  
727 of the color rings. *Evolution*. Retrieved from <http://www.jstor.org/stable/2411050>
- 728 Monteiro, A., Chen, B., Ramos, D. M., Oliver, J. C., Tong, X., Guo, M., ... Kamal, F. (2013). Distal-less  
729 regulates eyespot patterns and melanization in *Bicyclus* butterflies. *Journal of Experimental*  
730 *Zoology Part B: Molecular and Developmental Evolution*, *320*(5), 321–331.  
731 <https://doi.org/10.1002/jez.b.22503>
- 732 Monteiro, A., Chen, B., Scott, L. C., Vedder, L., Prijs, H. J., Belicha-Villanueva, A., & Brakefield, P. M.  
733 (2007). The combined effect of two mutations that alter serially homologous color pattern  
734 elements on the fore and hindwings of a butterfly. *BMC Genetics*, *8*, 22.  
735 <https://doi.org/10.1186/1471-2156-8-22>
- 736 Monteiro, A., Glaser, G., Stockslager, S., Glandsorp, N., & Ramos, D. M. (2006). Comparative insights  
737 into questions of lepidopteran wing pattern homology. *BMC Developmental Biology*, *6*(1), 52.  
738 <https://doi.org/10.1186/1471-213X-6-52>
- 739 Monteiro, A., Prijs, J., Bax, M., Hakkaart, T., & Brakefield, P. M. (2003). Mutants highlight the modular  
740 control of butterfly eyespot patterns. *Evolution and Development*, *5*(2), 180–187.  
741 <https://doi.org/10.1046/j.1525-142X.2003.03029.x>
- 742 Nadeau, N. J., Ruiz, M., Salazar, P., Counterman, B. A., Medina, J. A., Ortiz-Zuazaga, H., ... Papa, R.  
743 (2014). Population genomics of parallel hybrid zones in the mimetic butterflies, *H. melpomene*  
744 and *H. erato*. *Genome Research*, *24*(8), 1316–1333. <https://doi.org/10.1101/gr.169292.113>
- 745 Narum, S. R., Buerkle, C. A., Davey, J. W., Miller, M. R., & Hohenlohe, P. A. (2013). Genotyping-by-  
746 sequencing in ecological and conservation genomics. *Molecular Ecology*, *22*(11), 2841–2847.  
747 <https://doi.org/10.1111/mec.12350>
- 748 Nowell, R. W., Elsworth, B., Oostra, V., Zwaan, B. J., Wheat, C. W., Saastamoinen, M., ... Blaxter, M.  
749 (2017). A high-coverage draft genome of the mycalesine butterfly *Bicyclus anynana*.  
750 *GigaScience*. <https://doi.org/10.1093/gigascience/gix035>
- 751 Ohde, T., Yaginuma, T., & Niimi, T. (2013). Insect Morphological Diversification Through the  
752 Modification of Wing Serial Homologs. *Science*, *340*(6131), 495–498.  
753 <https://doi.org/10.1126/science.1234219>
- 754 Oliver, J. C., Beaulieu, J. M., Gall, L. F., Piel, W. H., & Monteiro, A. (2014). Nymphalid eyespot serial  
755 homologues originate as a few individualized modules. *Proceedings of the Royal Society B:*  
756 *Biological Sciences*, *281*(1787), 20133262–20133262. <https://doi.org/10.1098/rspb.2013.3262>
- 757 Oliver, J. C., Tong, X., Gall, L. F., Piel, W. H., & Monteiro, A. (2012). A Single Origin for Nymphalid  
758 Butterfly Eyespots Followed by Widespread Loss of Associated Gene Expression. *PLoS Genetics*,  
759 *8*(8). <https://doi.org/10.1371/journal.pgen.1002893>
- 760 Owen, D. (1993). Spot variation in *Maniola jurtina* (L.) (Lepidoptera: Satyridae) in southern Portugal  
761 and a comparison with the Canary Islands. *Biological Journal of the Linnean Society*, *49*(4), 355–  
762 365. <https://doi.org/10.1006/bijl.1993.1041>
- 763 Özsu, N., & Monteiro, A. (2017). Wound healing, calcium signaling, and other novel pathways are  
764 associated with the formation of butterfly eyespots. *BMC Genomics*, *18*(1), 788.  
765 <https://doi.org/10.1186/s12864-017-4175-7>
- 766 Payre, F., Vincent, A., & Carreno, S. (1999). ovo/svb integrates Wingless and DER pathways to control  
767 epidermis differentiation. *Nature*, *400*(6741), 271–275. <https://doi.org/10.1038/22330>
- 768 Prakash, A., & Monteiro, A. (2018). apterous A specifies dorsal wing patterns and sexual traits in  
769 butterflies. *Proceedings of the Royal Society of London B: Biological Sciences*, *285*(1873).  
770 <https://doi.org/10.1098/rspb.2017.2685>
- 771 Purcell, S., Neale, B., Todd-Brown, K., Thomas, L., Ferreira, M. A. R., Bender, D., ... Sham, P. C. (2007).  
772 PLINK: A Tool Set for Whole-Genome Association and Population-Based Linkage Analyses. *The*  
773 *American Journal of Human Genetics*, *81*(3), 559–575. <https://doi.org/10.1086/519795>

- 774 Reed, R. D., Papa, R., Martin, A., Hines, H. M., Counterman, B. A., Pardo-Diaz, C., ... McMillan, W. O.  
775 (2011). optix Drives the Repeated Convergent Evolution of Butterfly Wing Pattern Mimicry.  
776 *Science*, 333(6046), 1137–1141. <https://doi.org/10.1126/science.1208227>  
777 Reed, R. D., & Serfas, M. S. (2004). Butterfly Wing Pattern Evolution Is Associated with Changes in a  
778 Notch/Distal-less Temporal Pattern Formation Process. *Current Biology*, 14(13), 1159–1166.  
779 <https://doi.org/10.1016/j.cub.2004.06.046>  
780 Rellstab, C., Gugerli, F., Eckert, A. J., Hancock, A. M., & Holderegger, R. (2015). A practical guide to  
781 environmental association analysis in landscape genomics. *Molecular Ecology*, 24(17), 4348–  
782 4370. <https://doi.org/10.1111/mec.13322>  
783 Rochette, N. C., & Catchen, J. M. (2017). Deriving genotypes from RAD-seq short-read data using  
784 Stacks. *Nature Protocols*, 12(12), 2640–2659. <https://doi.org/10.1038/nprot.2017.123>  
785 Ronshaugen, M., McGinnis, N., & McGinnis, W. (2002). Hox protein mutation and macroevolution of  
786 the insect body plan. *Nature*, 415, 914. <https://doi.org/10.0.4.14/nature716>  
787 Ruvinsky, I., & Gibson-Brown, J. J. (2000). Genetic and developmental bases of serial homology in  
788 vertebrate limb evolution. *Development*, 127(24), 5233 LP-5244. Retrieved from  
789 <http://dev.biologists.org/content/127/24/5233.abstract>  
790 Saenko, S. V., Marialva, M. S., & Beldade, P. (2011). Involvement of the conserved Hox gene  
791 Antennapedia in the development and evolution of a novel trait. *EvoDevo*, 2(1), 9.  
792 <https://doi.org/10.1186/2041-9139-2-9>  
793 Santos, M. E., Braasch, I., Boileau, N., Meyer, B. S., Sauter, L., Böhne, A., ... Salzburger, W. (2014). The  
794 evolution of cichlid fish egg-spots is linked with a cis-regulatory change. *Nature*  
795 *Communications*, 5, 5149. <https://doi.org/10.1038/ncomms6149>  
796 Schachat, S. R., Oliver, J. C., & Monteiro, A. (2015). Nymphalid eyespots are co-opted to novel wing  
797 locations following a similar pattern in independent lineages. *BMC Evolutionary Biology*, 15(1),  
798 20. <https://doi.org/10.1186/s12862-015-0300-x>  
799 Stern, D. L., & Orgogozo, V. (2008). THE LOCI OF EVOLUTION: HOW PREDICTABLE IS GENETIC  
800 EVOLUTION? *Evolution*, 62(9), 2155–2177. <https://doi.org/10.1111/j.1558-5646.2008.00450.x>  
801 Supple, M. A., Hines, H. M., Dasmahapatra, K. K., Lewis, J. J., Nielsen, D. M., Lavoie, C., ... Counterman, B.  
802 A. (2013). Genomic architecture of adaptive color pattern divergence and convergence in  
803 Heliconius butterflies. *Genome Research*, 23(8), 1248–1257.  
804 <https://doi.org/10.1101/gr.150615.112>  
805 Tien, A.-C., Rajan, A., Schulze, K. L., Ryoo, H. D., Acar, M., Steller, H., & Bellen, H. J. (2008). Ero1L, a thiol  
806 oxidase, is required for Notch signaling through cysteine bridge formation of the Lin12-Notch  
807 repeats in *Drosophila melanogaster*. *The Journal of Cell Biology*, 182(6), 1113–1125.  
808 <https://doi.org/10.1083/jcb.200805001>  
809 Tokita, C. K., Oliver, J. C., & Monteiro, A. (2013). A Survey of Eyespot Sexual Dimorphism across  
810 Nymphalid Butterflies. *International Journal of Evolutionary Biology*, 2013, 1–6.  
811 <https://doi.org/10.1155/2013/926702>  
812 Tomoyasu, Y., Wheeler, S. R., & Denell, R. E. (2005). Ultrabithorax is required for membranous wing  
813 identity in the beetle *Tribolium castaneum*. *Nature*, 433(7026), 643–647.  
814 <https://doi.org/10.1038/nature03272>  
815 Tong, X., Hrycaj, S., Podlaha, O., Popadić, A., & Monteiro, A. (2014). Over-expression of Ultrabithorax  
816 alters embryonic body plan and wing patterns in the butterfly *Bicyclus anynana*. *Developmental*  
817 *Biology*, 394(2), 357–366. <https://doi.org/10.1016/j.ydbio.2014.08.020>  
818 Van Belleghem, S. M., Rastas, P., Papanicolaou, A., Martin, S. H., Arias, C. F., Supple, M. A., ... Papa, R.  
819 (2017). Complex modular architecture around a simple toolkit of wing pattern genes. *Nature*  
820 *Ecology & Evolution*, 1, 0052. <https://doi.org/10.1038/s41559-016-0052>  
821 Weatherbee, S. D., Frederik Nijhout, H., Grunert, L. W., Halder, G., Galant, R., Selegue, J., & Carroll, S.  
822 (1999). Ultrabithorax function in butterfly wings and the evolution of insect wing patterns.  
823 *Current Biology*, 9(3), 109–115. [https://doi.org/10.1016/S0960-9822\(99\)80064-5](https://doi.org/10.1016/S0960-9822(99)80064-5)  
824 Werner, T., Koshikawa, S., Williams, T. M., & Carroll, S. B. (2010). Generation of a novel wing colour  
825 pattern by the Wingless morphogen. *Nature*, 464(7292), 1143–1148.  
826 <https://doi.org/10.1038/nature08896>  
827 Westerman, E. L., Chirathivat, N., Schyling, E., & Monteiro, A. (2014). Mate preference for a  
828 phenotypically plastic trait is learned, and may facilitate preference-phenotype matching.



829           *Evolution*, 68(6), 1661–1670. <https://doi.org/10.1111/evo.12381>  
830 Westerman, E. L., Monteiro, A., Sherry, D., Hoshooley, J., Snell-Rood, E., Davidowitz, G., ... Rutowski, R.  
831 (2016). Rearing Temperature Influences Adult Response to Changes in Mating Status. *PLOS*  
832 *ONE*, 11(2), e0146546. <https://doi.org/10.1371/journal.pone.0146546>  
833 Yamamoto-Hino, M., & Goto, S. (2016). Spätzle-Processing Enzyme-independent Activation of the Toll  
834 Pathway in *Drosophila* Innate Immunity. *Cell Structure and Function*, 41(1), 55–60.  
835 <https://doi.org/10.1247/csf.16002>  
836  
837

838 **Table legends**

839

840 **Table 1. DHEN is heritable.** Summary DHEN data for offspring from 6 families each  
841 of 0x0, 1x1, and 2x2 DHEN crosses, separated by sex. Offspring with asymmetric  
842 DHEN are included in the average DHEN estimate.

843

844 **Table 2. DHEN candidate genes.** BANY.1.2 gene ID, gene name, molecular function,  
845 biological process, BANY.1.2 scaffold ID all refer to the *B. anynana* v1.2 genome  
846 assembly and annotation (Nowell et al., 2017).

847 **Figure legends**

848

849 **Figure 1. Eyespot pattern and number variation in *Bicyclus anynana*.** (A) Eyespot  
850 pattern on the ventral side of wings: forewing displays two eyespots; hindwing  
851 displays seven eyespots. (B) Eyespots pattern on dorsal side of wings. Male (left)  
852 displaying two dorsal forewing eyespots and zero dorsal hindwing eyespots and  
853 female displaying two dorsal forewing eyespots and three dorsal hindwing eyespots.  
854 (C) Dorsal hindwing eyespot number (DHEN) variation, ranging from zero to five UV-  
855 reflective spots, marked by white arrows (i–vi).

856

857 **Figure 2. Genome-wide population structure and linkage disequilibrium (LD)**  
858 **in the study population. (A.)** Principal Component Analysis (PCA) of the allelic  
859 variation observed in 5000 randomly-selected genome-wide SNPs in the study  
860 population across both phenotype groups, DHE presence (*pre*, red) and DHE absence  
861 (*abs*, blue). Ellipses display boundaries of the 95% confidence interval. Little  
862 contribution to variation in the principal components and overlap of the variation on  
863 both phenotype groups suggests lack of underlying demographic substructuring in  
864 the study population. **(B.)** Genome-wide linkage disequilibrium (LD) in the *B.*  
865 *anynana* study population. Grey dots represent LD values for a SNP pairwise  
866 comparison. In red, Loess regression smoothed curve representing LD decay. Insert:  
867 Zoomed-in LD decay curve, indicating distance at which LD is halved (465,570 bp)  
868 and corresponding  $r^2$  value (0.137).

869

870 **Figure 3. Genome-wide association with dorsal hindwing eyespot number. (A.)**

871 Plots show genomic association to dorsal hindwing eyespot number (top) and

872  $F_{ST}$  between individuals with different dorsal hindwing eyespot numbers (bottom).

873 Each dot represents a single SNP. Dashed lines represent the threshold for detecting

874 a significant genome-wide association (top, in red) and  $F_{ST}$  (bottom, in blue). Scaffolds

875 containing both significant association and  $F_{ST}$  outliers are marked with asterisks.

876 **(B.)** Genomic scaffolds from the *Bicyclus anynana*\_v1x2 genome are arranged along

877 the 21 chromosomes of the *Heliconius melpomene* v2 assembly. For ordering the *B.*

878 *anynana* scaffolds along the *H. melpomene* genome, only matches with a minimum

879 percentage of identity of 90% and a minimum alignment length of 200 bp were used.

880 If scaffolds matched multiple *H. melpomene* chromosomes, the scaffold was

881 positioned along the chromosome to which it had the most matches. Using this

882 strategy 76.7% of the *B. anynana* genome scaffolds were aligned to the *H.*

883 *melpomene* genome.

884

885 **Figure 4. Zoom-in on putative genomic regions underlying dorsal hindwing**

886 **eyespot number variation.** Plots show genomic association to dorsal hindwing

887 eyespot number (top) and  $F_{ST}$  (bottom) between individuals with different dorsal

888 hindwing eyespot numbers for scaffolds with significant outliers (red for association

889 and blue for  $F_{ST}$ ). Each dot represents a single SNP. Green and red lines show matches

890 of the *B. anynana* scaffolds (minimum percentage of identity of 70% and a minimum

891 alignment length of 150 bp) to the *H. melpomene* v2 assembly. Green lines represent

892 the most frequent matches of the scaffold to a *H. melpomene* chromosome, whereas

893 red lines represent matches to a different *H. melpomene* chromosome. Vertical black  
894 rectangles represent gene models. Gene models in red represent genes that have  
895 previously been demonstrated to be involved in eye spot development.

**Table 1: DHEN is heritable.** Summary DHEN data for offspring from 6 families each of 0x0, 1x1, and 2x2 DHEN crosses, separated by sex. Offspring with asymmetric DHEN are included in the average DHEN estimate.

|                     | <b>0 x 0 DHEN Families</b> |             | <b>1 x 1 DHEN Families</b> |             | <b>2 x 2 DHEN Families</b> |             |
|---------------------|----------------------------|-------------|----------------------------|-------------|----------------------------|-------------|
|                     | Females                    | Males       | Females                    | Males       | Females                    | Males       |
| 0 DHEN              | 46                         | 159         | 2                          | 47          | 0                          | 14          |
| 1 DHEN              | 55                         | 15          | 45                         | 36          | 19                         | 38          |
| 2 DHEN              | 24                         | 2           | 43                         | 9           | 67                         | 27          |
| 3 DHEN              | 2                          | 0           | 4                          | 0           | 6                          | 0           |
| <b>Average DHEN</b> | <b>0.87</b>                | <b>0.17</b> | <b>1.49</b>                | <b>0.63</b> | <b>1.87</b>                | <b>1.13</b> |

**Table 2: DHEN candidate genes.** BANY.1.2 gene ID, gene name, molecular function, biological process, BANY.1.2 scaffold ID all refer to the *B. anynana* v1.2 genome assembly and annotation (Nowell et al., 2017).

| BANY.1.2 gene ID | Gene name      | Gene description                                   | BANY.1.2 scaffold ID | Known candidate                                                        |
|------------------|----------------|----------------------------------------------------|----------------------|------------------------------------------------------------------------|
| g00030           | <i>CDase</i>   | Neutral ceramidase                                 | BANY00001            | Yes (Özsu & Monteiro, 2017)                                            |
| g00647           | <i>PIK3AP1</i> | Phosphoinositide 3-kinase adapter protein 1        | BANY00004            | No                                                                     |
| g00653           | <i>dpp</i>     | Protein decapentaplegic                            | BANY00004            | Yes (Connahs et al., 2017 - <i>bioRxiv</i> )                           |
| g00658           | <i>dlg1</i>    | Disks large 1 tumor suppressor protein             | BANY00004            | Yes (Cheah, Chia, & Yang, 2000; Q. Li et al., 2009; Tien et al., 2008) |
| g00659           | <i>cmk-1</i>   | Calcium/calmodulin-dependent protein kinase type 1 | BANY00004            | No                                                                     |
| g00681           | <i>numb</i>    | Protein numb                                       | BANY00004            | Yes (Cheah, Chia, & Yang, 2000; Q. Li et al., 2009; Tien et al., 2008) |
| g01110           | <i>ZC3H10</i>  | Zinc finger CCCH domain-containing protein 10      | BANY00007            | No                                                                     |
| g02571           | <i>Antp</i>    | Homeotic protein antennapedia                      | BANY00019            | Yes (Saenko, Marialva, & Beldade, 2011)                                |
| g02579           | <i>Ubx</i>     | Homeotic protein ultrabithorax                     | BANY00019            | Yes (Weatherbee 1999; Tomoyasu et al. 2005; Tong et al. 2014)          |
| g04715           | <i>C2CD5</i>   | C2 domain-containing protein 5                     | BANY00042            | No                                                                     |
| g04901           | <i>GGPS1</i>   | Geranylgeranyl pyrophosphate synthase              | BANY00044            | No                                                                     |
| g04904           | <i>slo</i>     | Calcium-activated potassium channel slowpoke       | BANY00044            | No                                                                     |
| g04910           | <i>spz</i>     | Protein spatzle                                    | BANY00044            | No                                                                     |
| g05412           | <i>pyx</i>     | Transient receptor potential channel pyrexia       | BANY00052            | No                                                                     |
| g10819           | <i>Ero1L</i>   | Ero1-like protein                                  | BANY00148            | Yes (Cheah, Chia, & Yang, 2000; Q. Li et al., 2009; Tien et al., 2008) |

**A**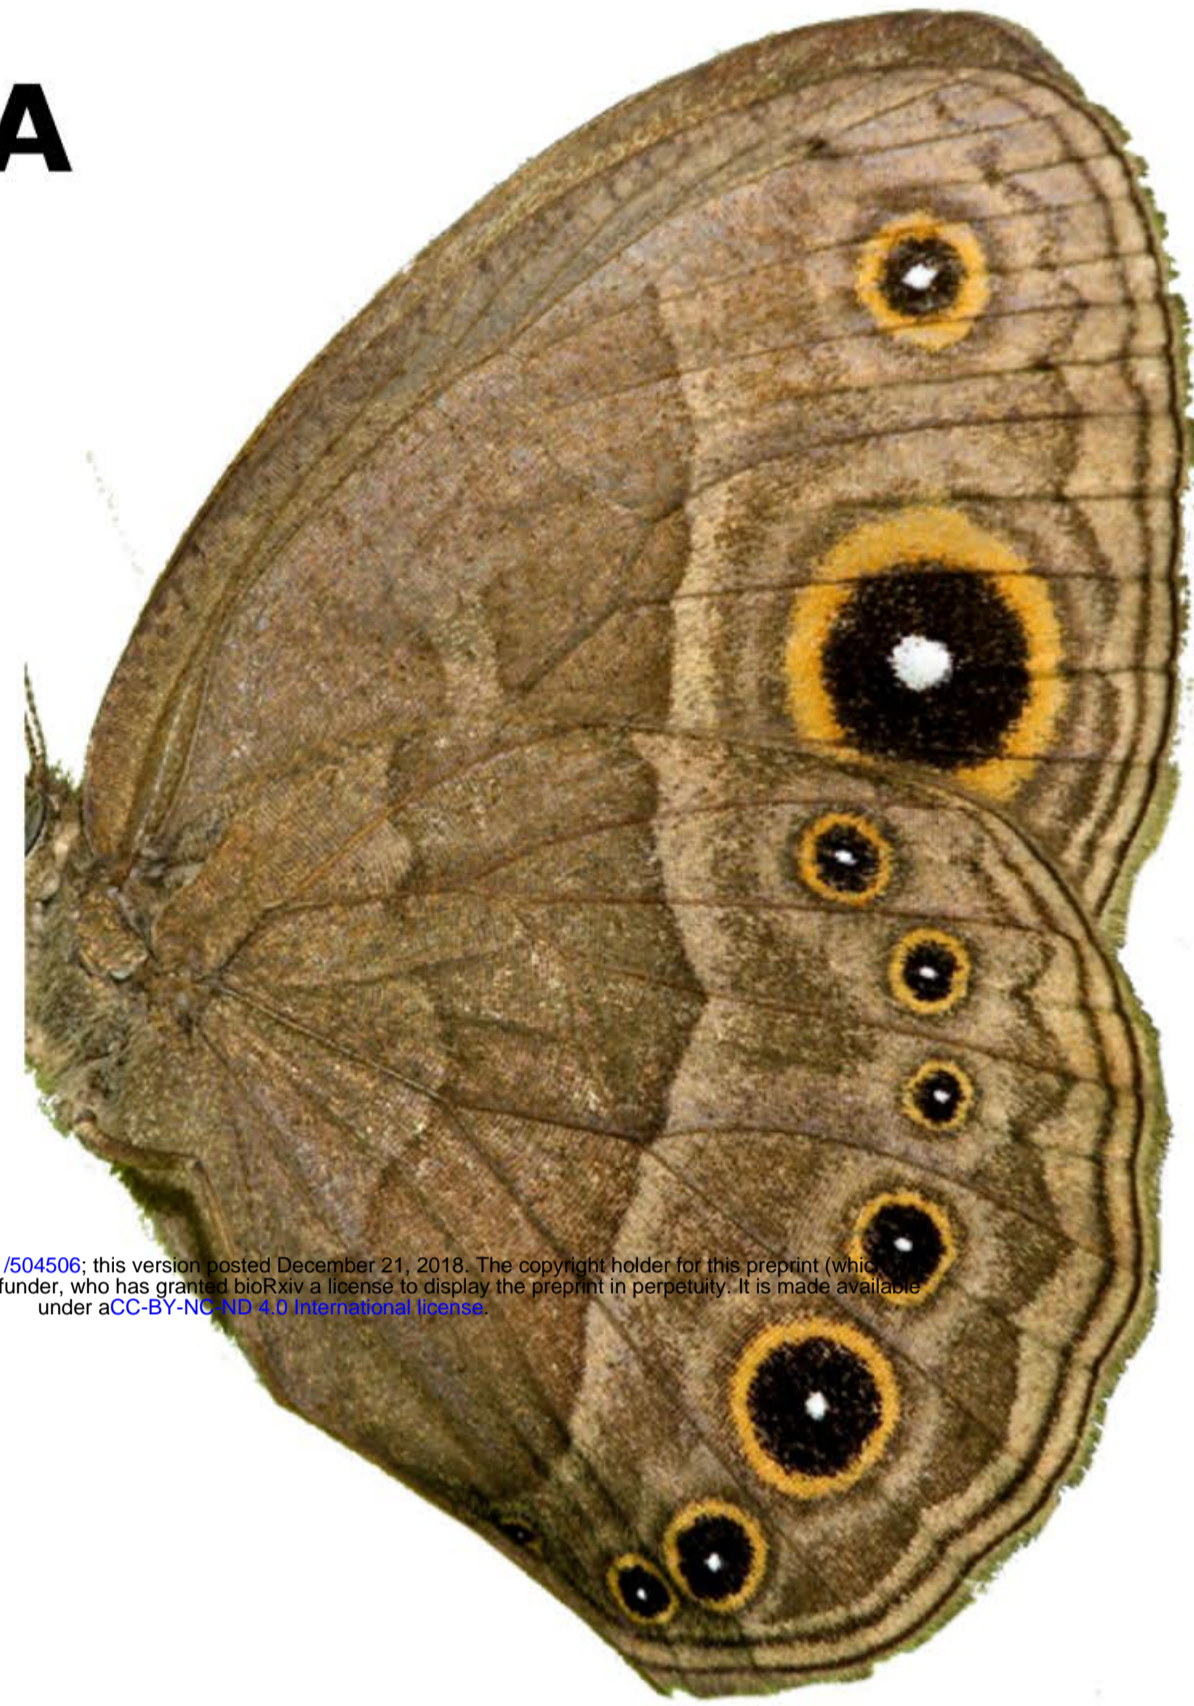**B**

(i)

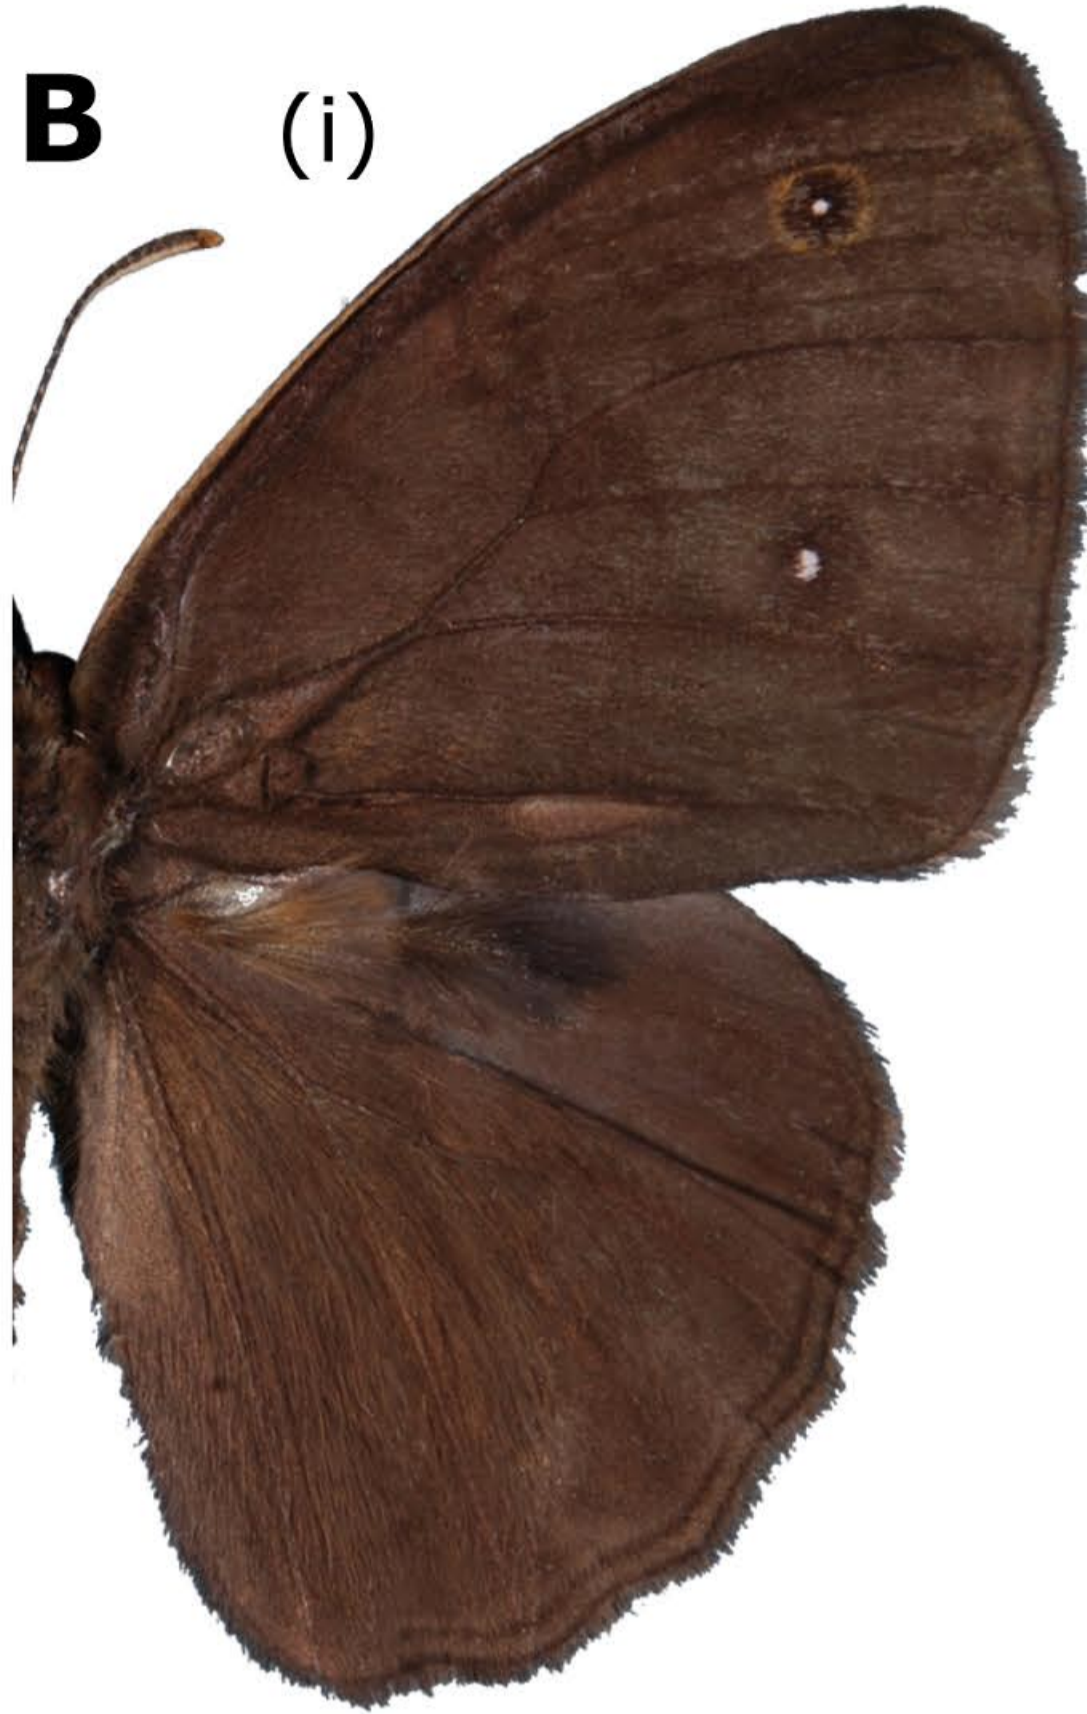

(ii)

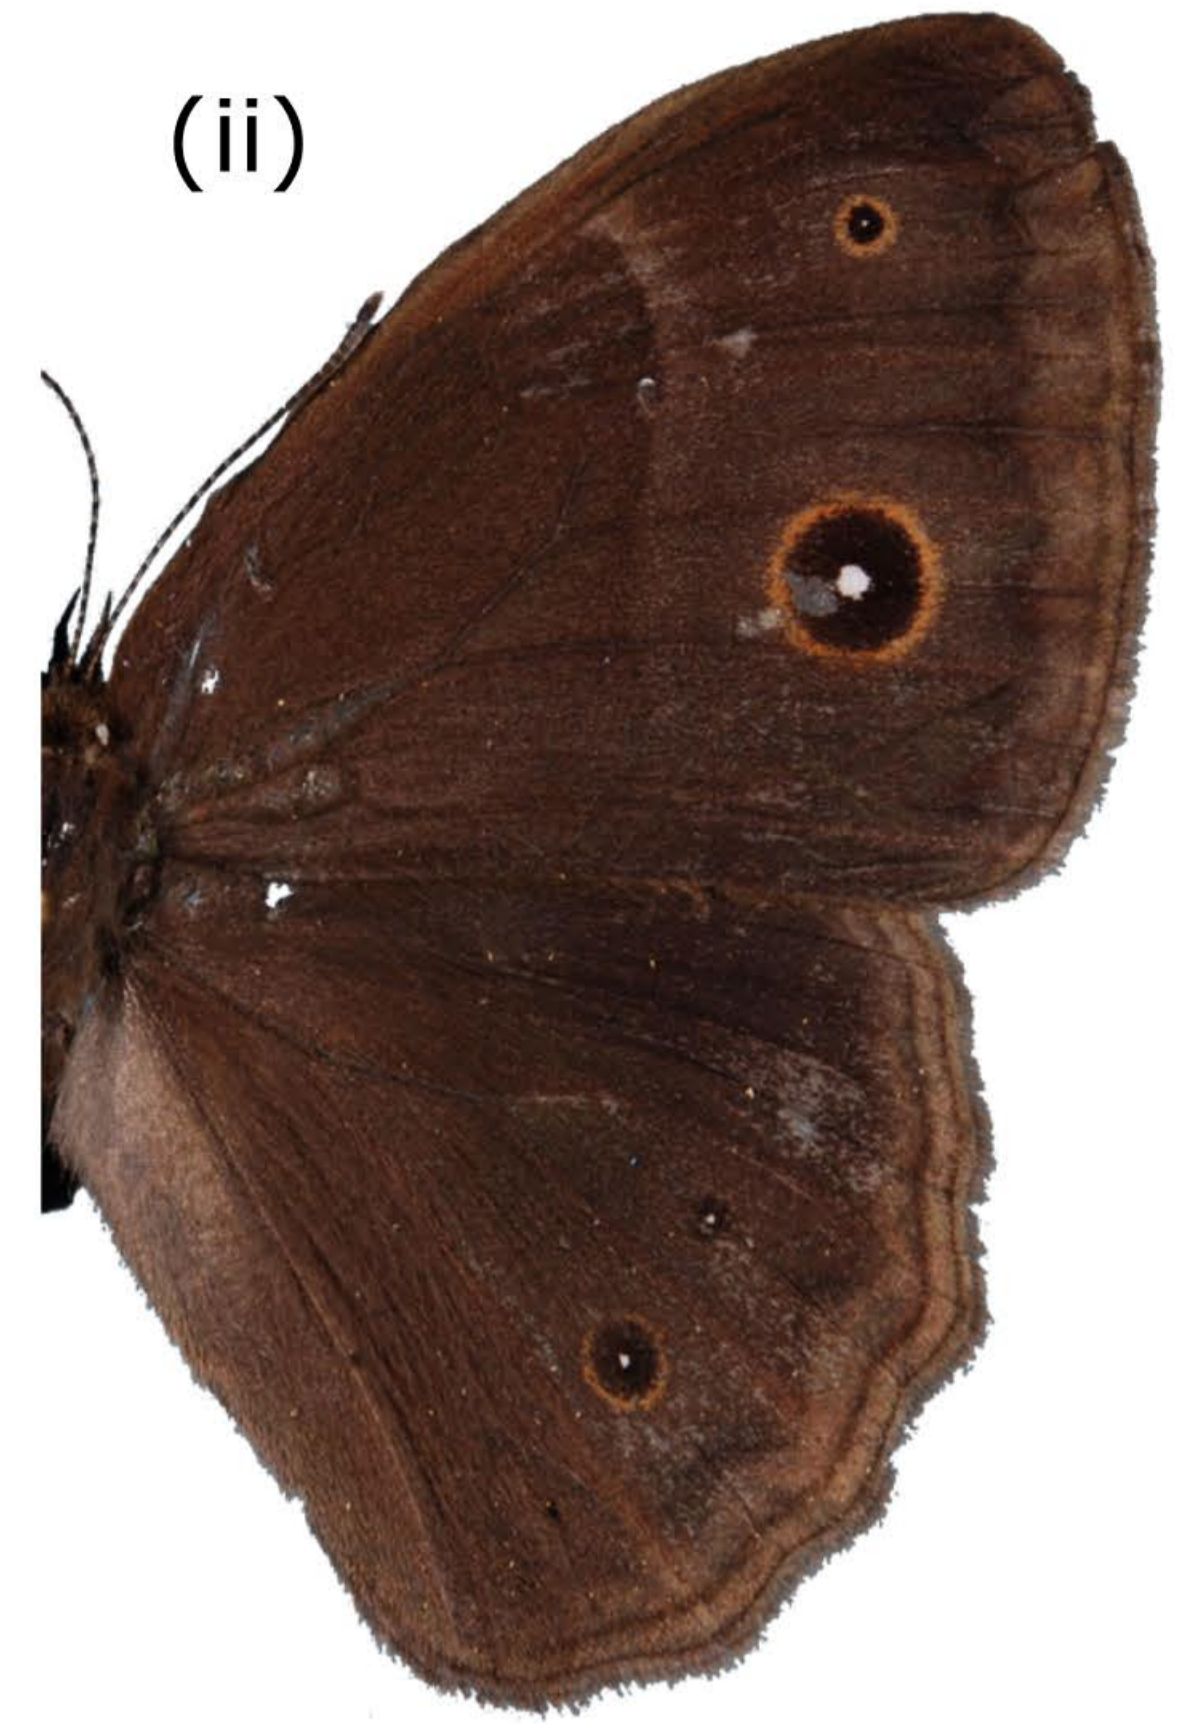

bioRxiv preprint doi: <https://doi.org/10.1101/504506>; this version posted December 21, 2018. The copyright holder for this preprint (which was not certified by peer review) is the author/funder, who has granted bioRxiv a license to display the preprint in perpetuity. It is made available under aCC-BY-NC-ND 4.0 International license.

**C**

(i)

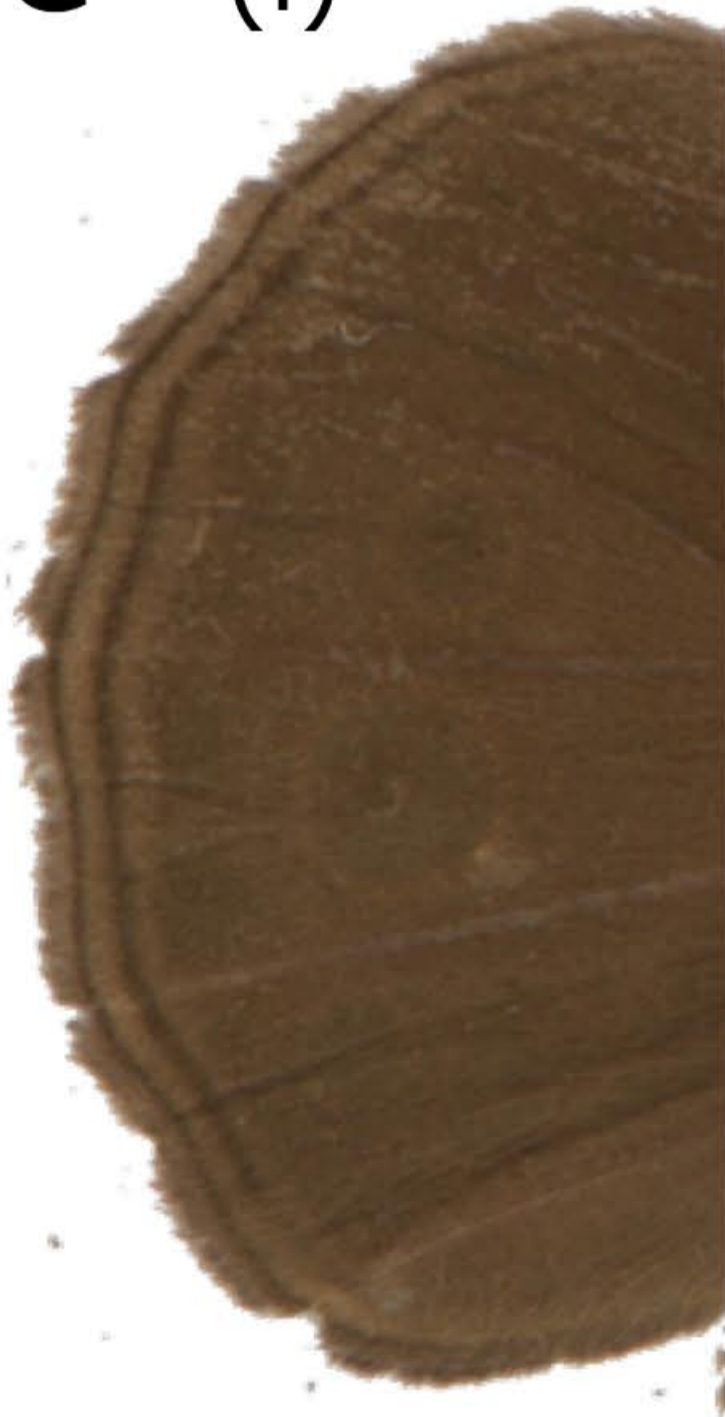

(ii)

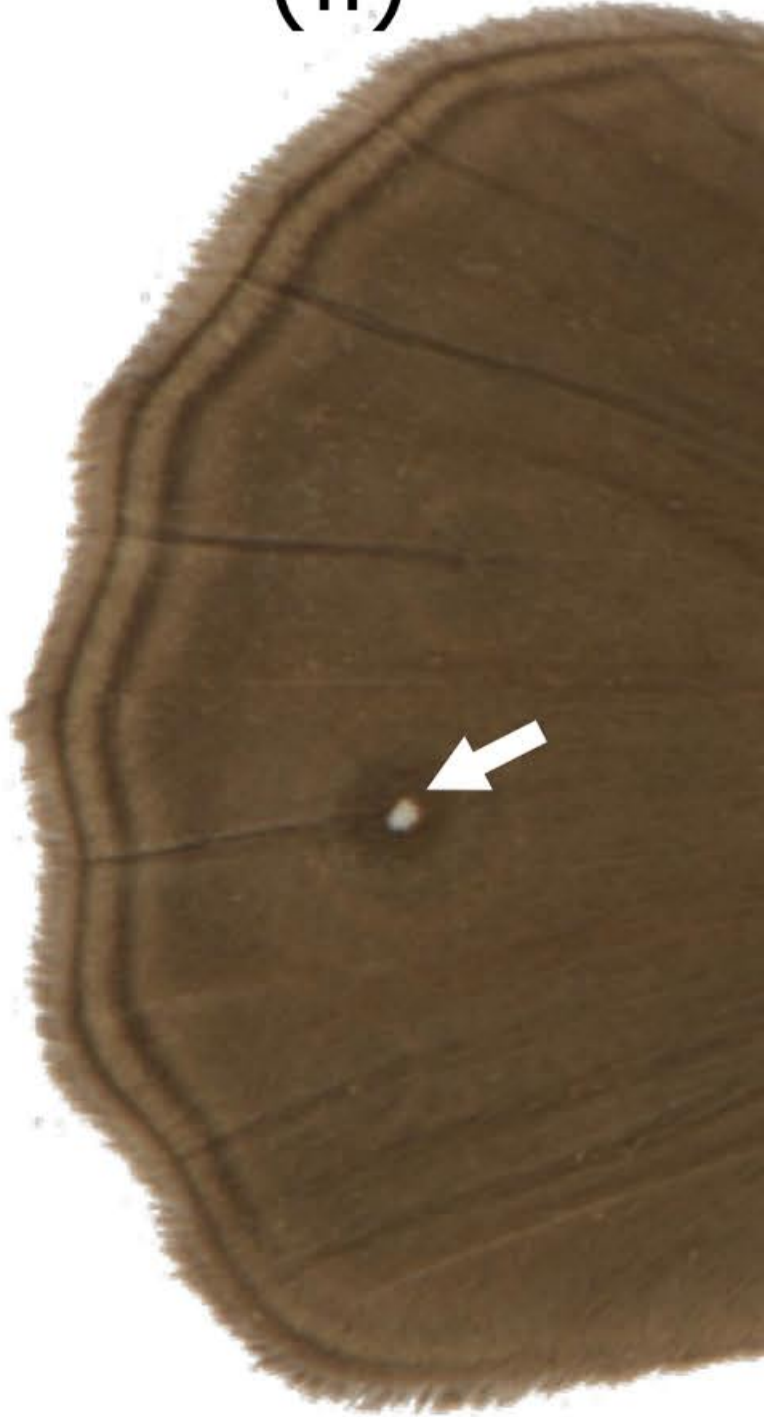

(iii)

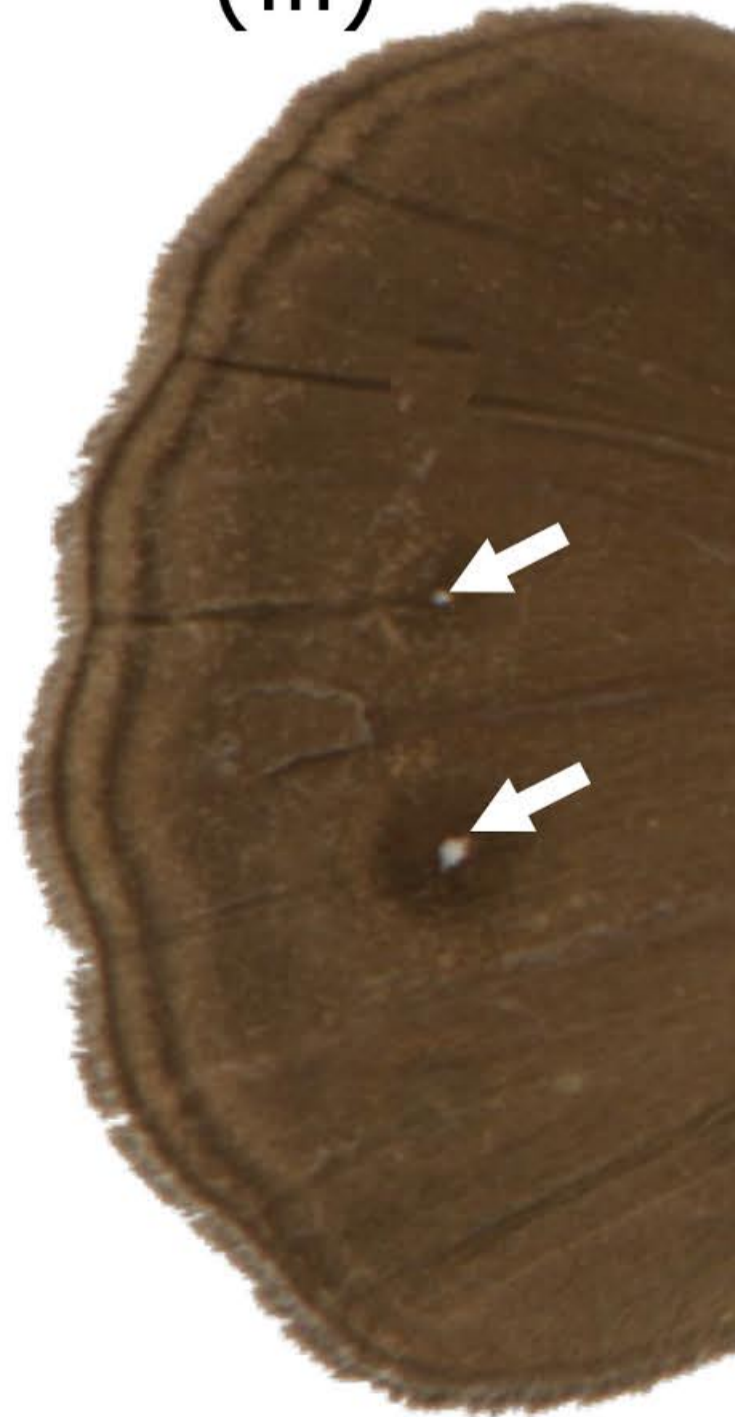

(iv)

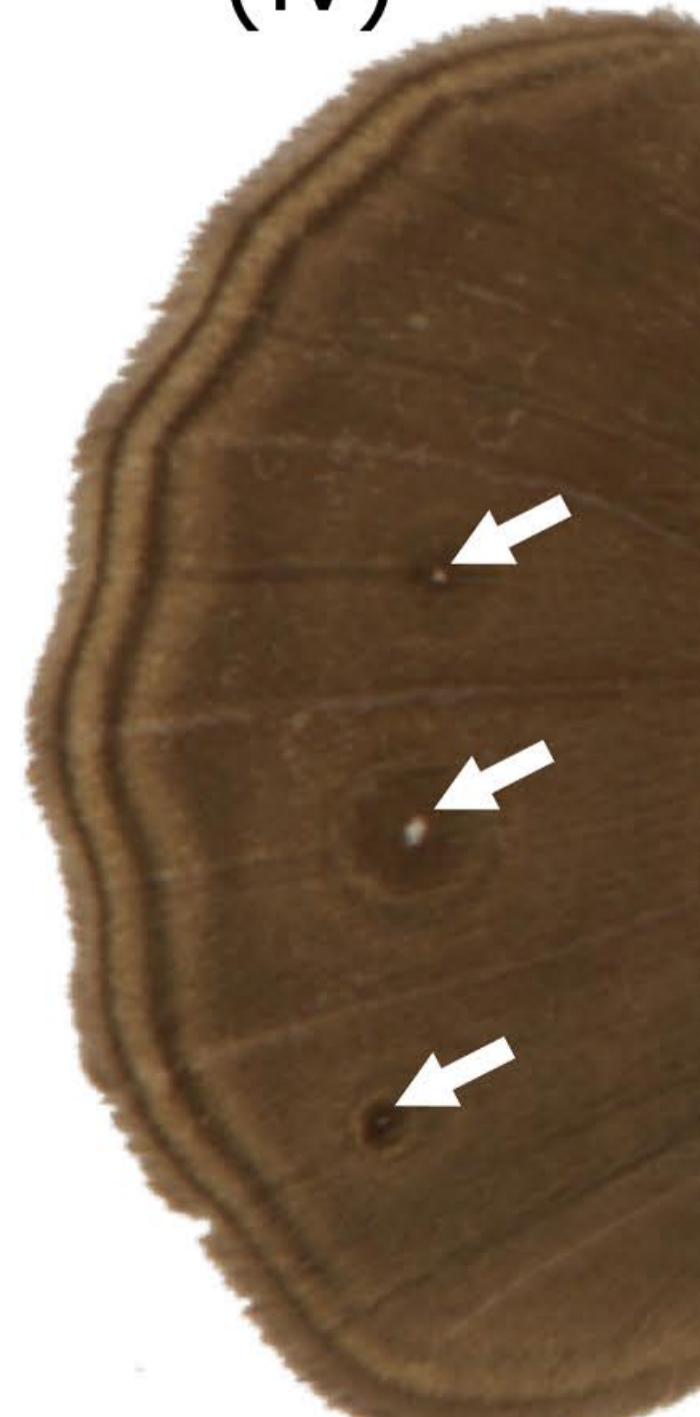

(v)

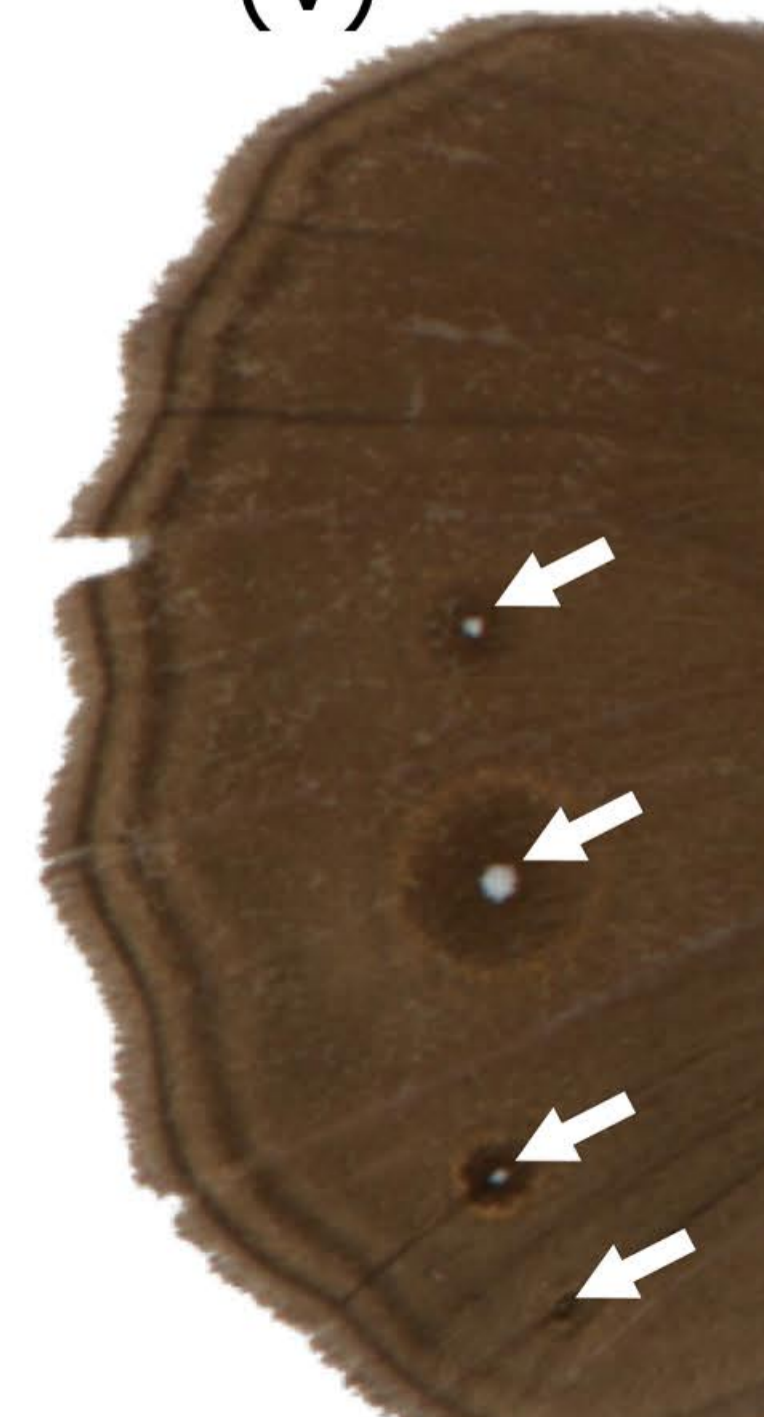

(vi)

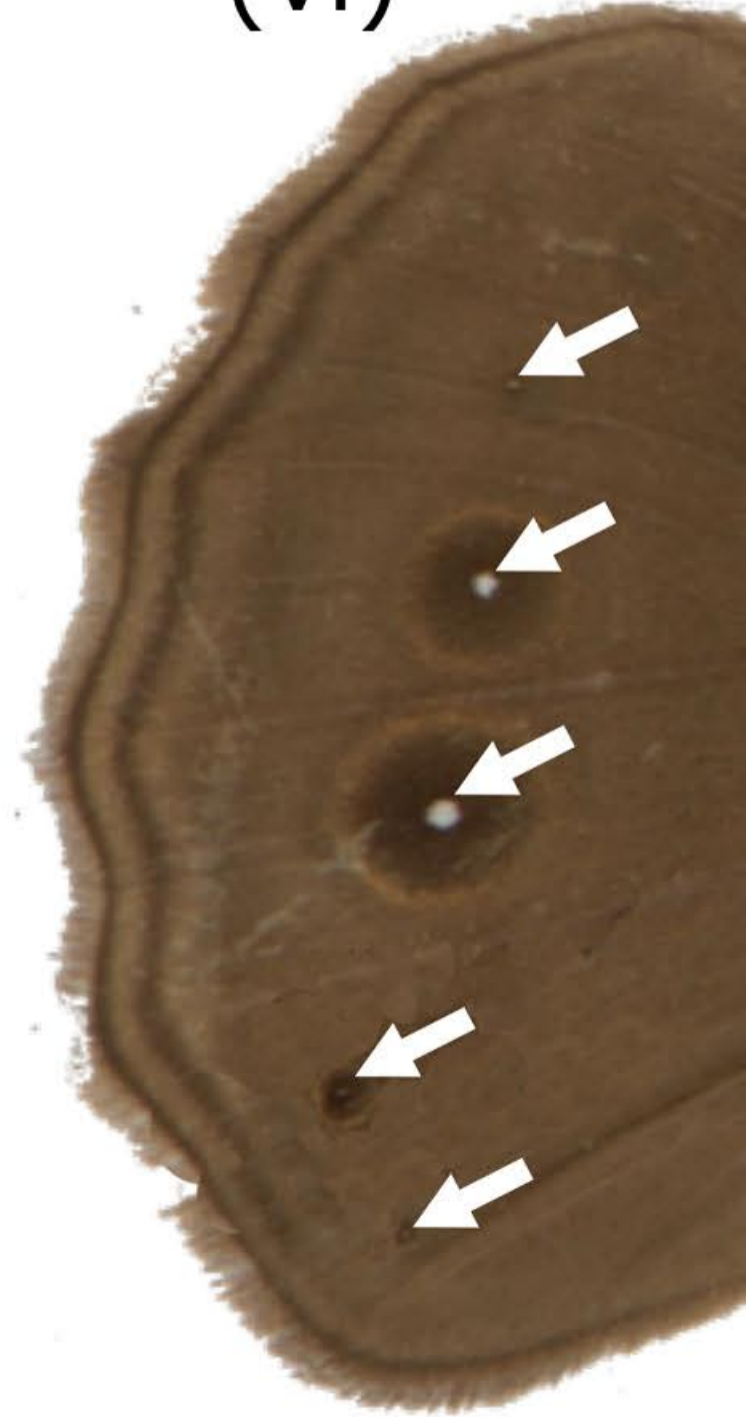



# A Partitioning of genome-wide variation

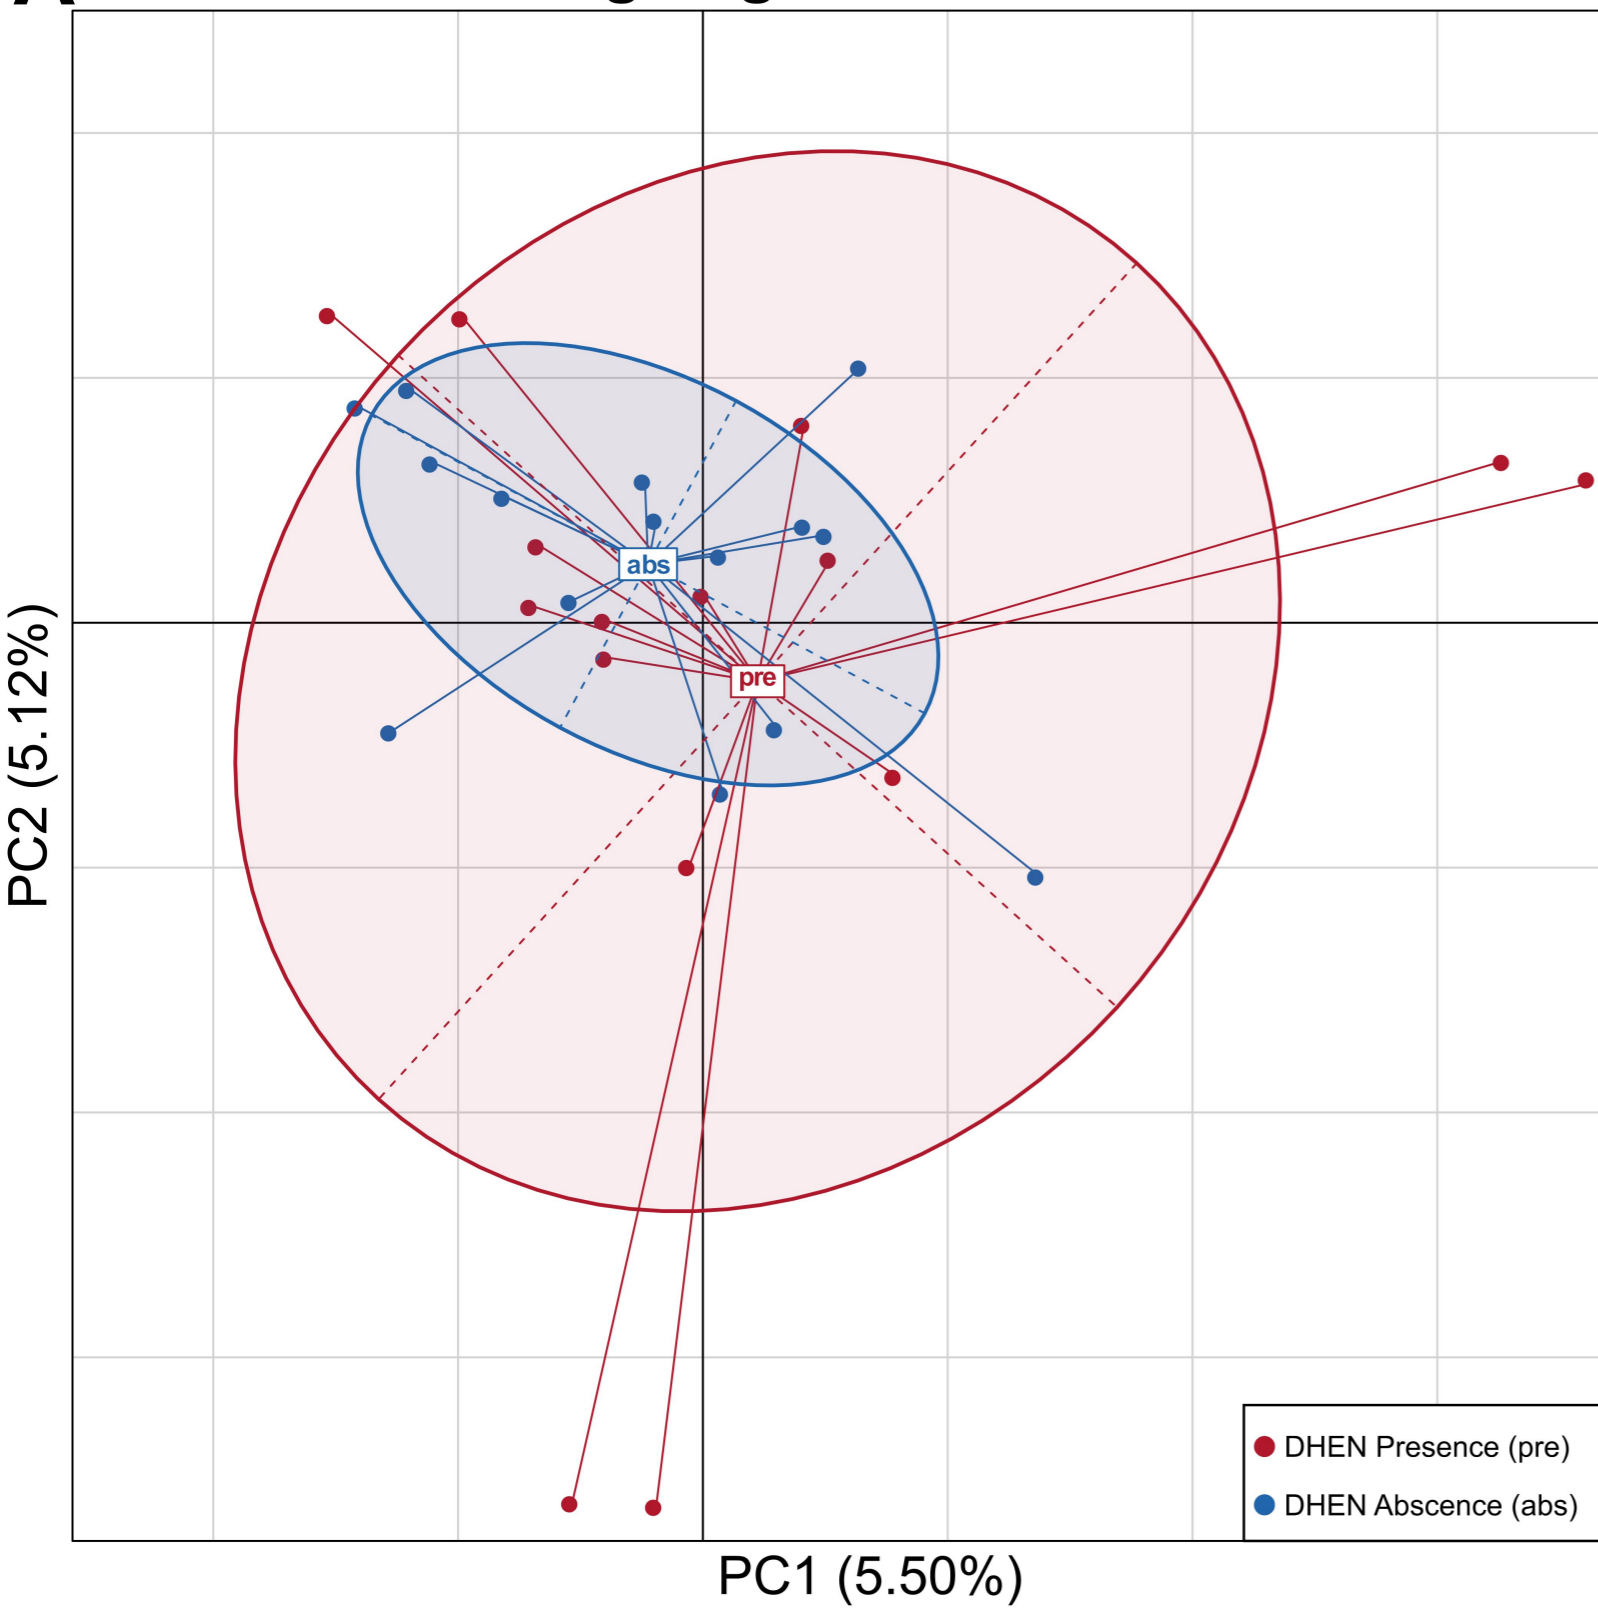

# B Genome-wide linkage disequilibrium

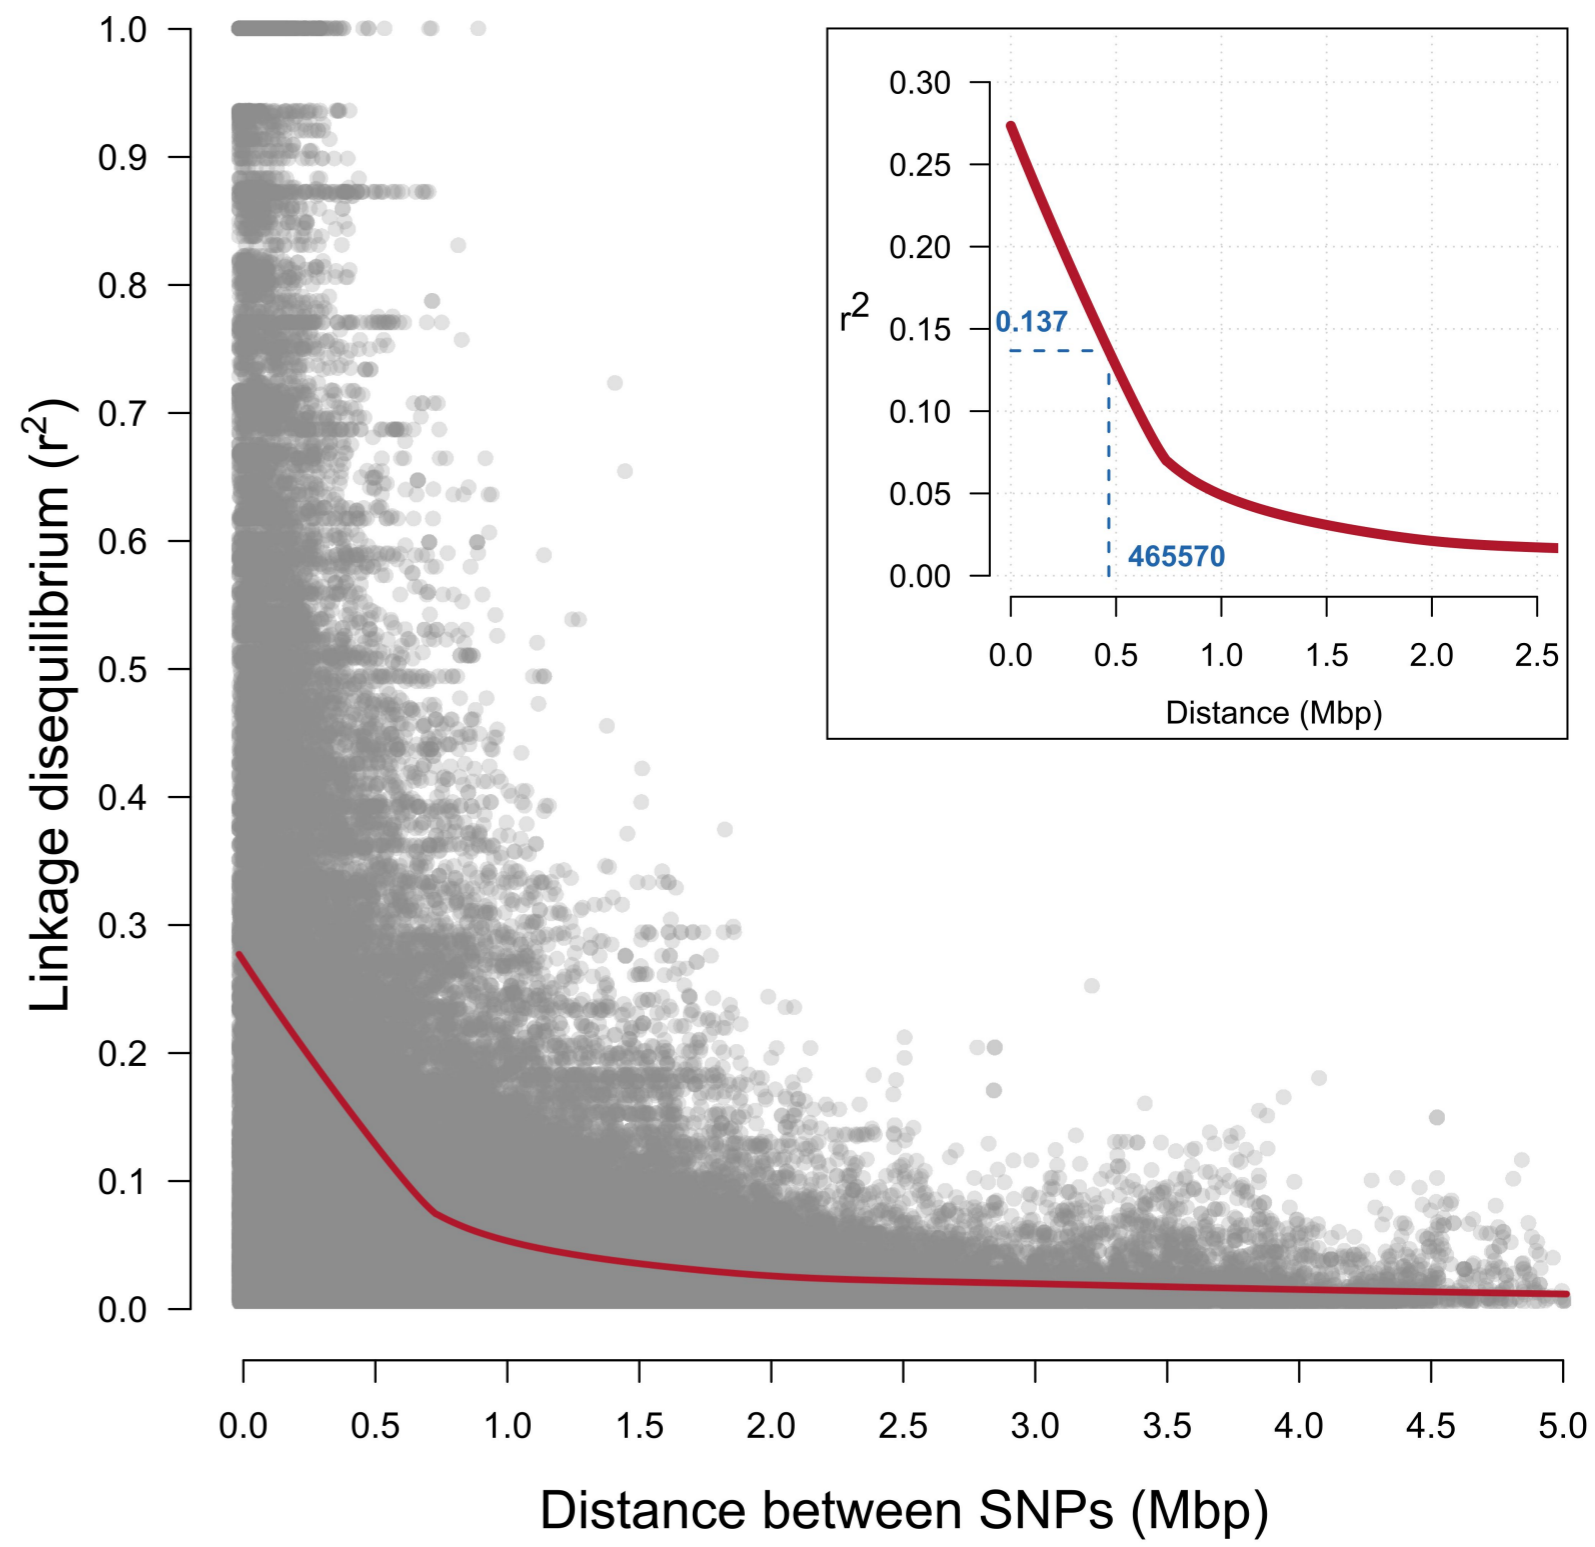

A.

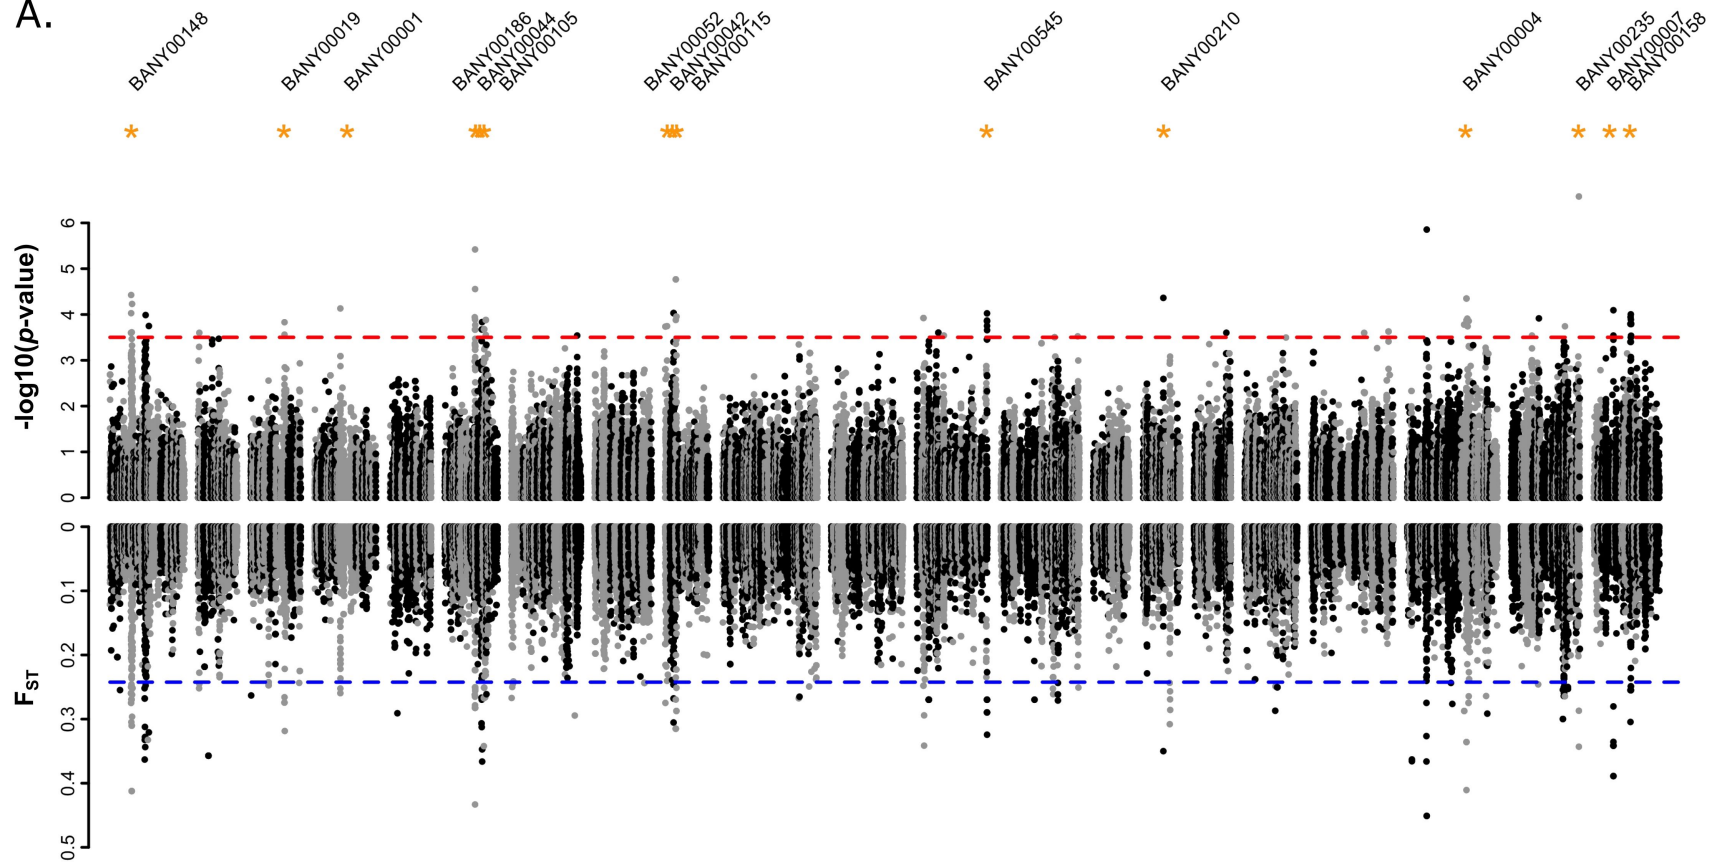

*Bicyclus anynana*

B.

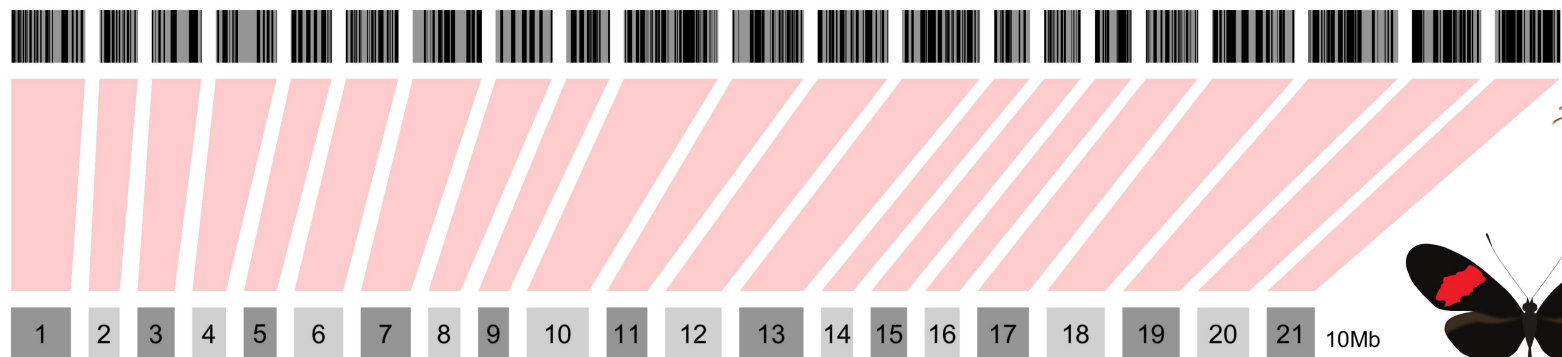

*Heliconius melpomene*

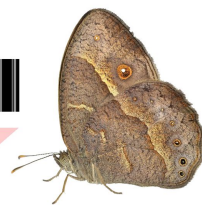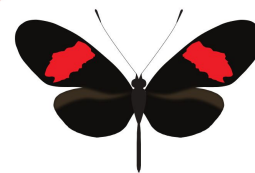

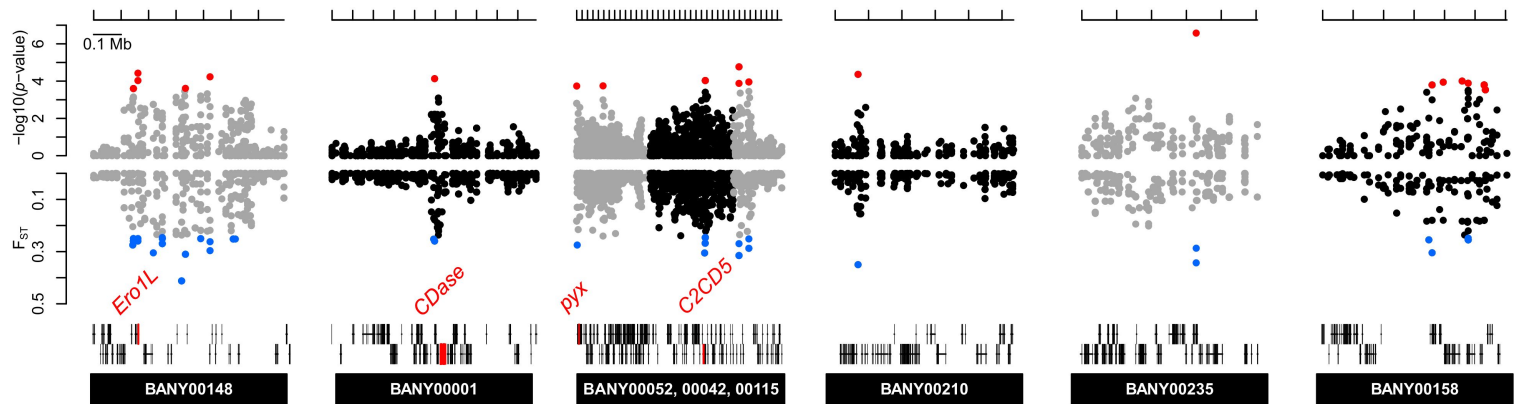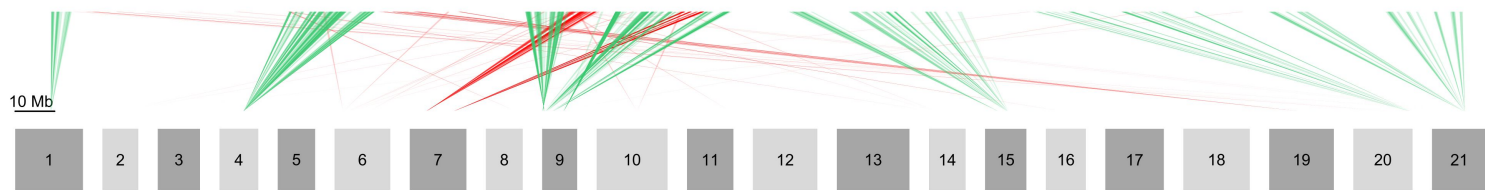

*Heliconius melpomene*

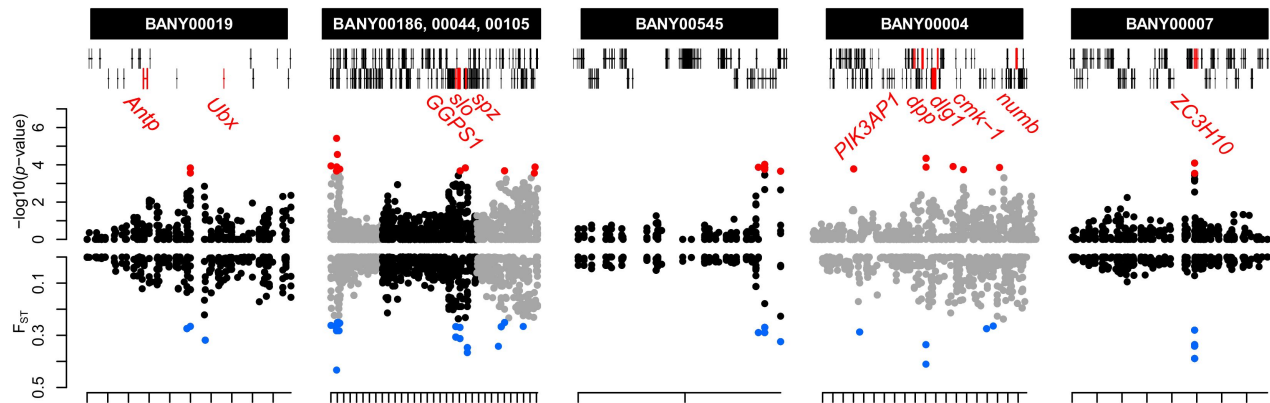

Source: https://www.biorxiv.org/content/10.1101/504506v1.full.pdf
